# Supplementary material for: Kinetochores attached to microtubule-ends are stabilised by Astrin bound PP1 to ensure proper chromosome segregation
Source: eLife journal article supplement (doi:10.7554/elife.49325), 2019-12-06
Supplement: supp [file elife-49325-supp-v1.zip]

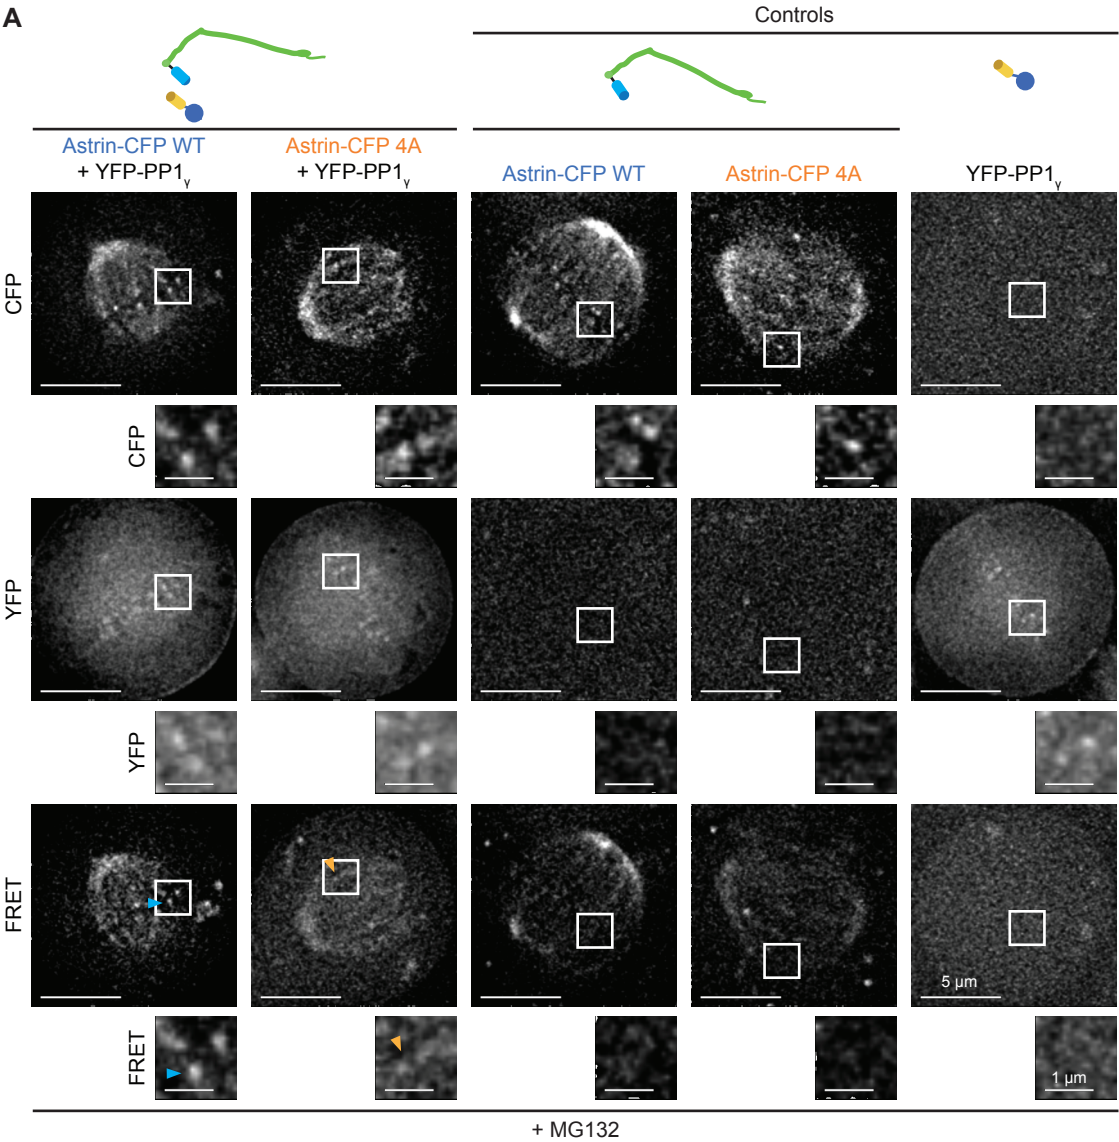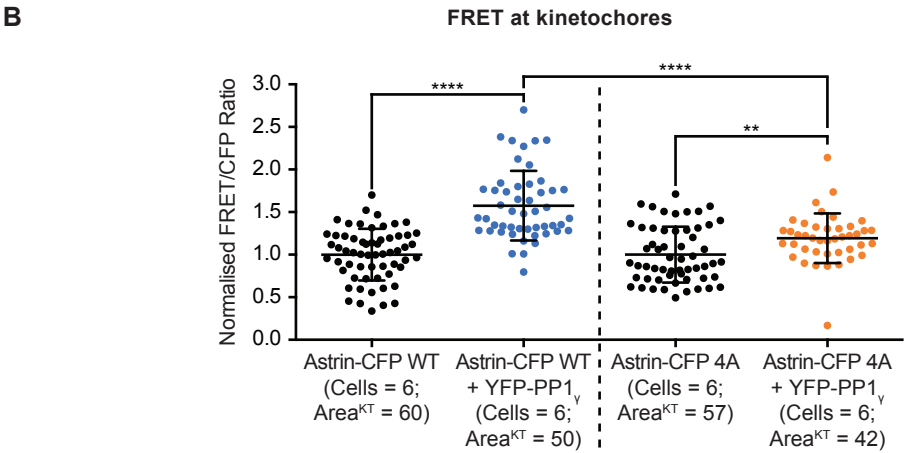

**Figure 4 supplement 2. FRET signals at kinetochores reduced in cells coexpressing YFP-PP1<sub>v</sub> and Astrin-4A compared to Astrin-CFP-WT**  
(**A**) Representative live-cell images show FRET emission (excitation<sup>CFP</sup>/emission<sup>YFP</sup>) signals of HeLa cells expressing either YFP-PP1<sub>v</sub> or Astrin-CFP-WT/Astrin-CFP-4A (as indicated) singly or both YFP-PP1<sub>v</sub> and Astrin-CFP and treated with MG132 for 1h before imaging. Cartoons of fusion proteins expressed in each condition are shown on the top. Arrowheads highlight kinetochore presenting high (cyan) or low (orange) FRET emission signal. (**B**) Graph shows the FRET/CFP intensity ratio at kinetochores measured from time-lapse movies as shown in **A**. Each dot represents a value from a kinetochore (KT) within a circular area corresponding to 3x3 pixels. Black bars and whiskers mark average value and standard deviation, respectively, from kinetochores across four experimental repeats. \*\*\*\* and \*\*\* indicate a statistically significant difference when  $p < 0.0001$  and  $p < 0.01$ , respectively. FRET/CFP ratio in cells coexpressing Astrin-CFP (WT or 4A) and YFP-PP1<sub>v</sub> are normalised against FRET/CFP ratio in cells singly expressing either Astrin-CFP -WT or -4A, respectively.
