# Supplementary material for: Kinetochores attached to microtubule-ends are stabilised by Astrin bound PP1 to ensure proper chromosome segregation
Source: eLife journal article supplement (doi:10.7554/elife.49325), 2019-12-06
Supplement: supp [file elife-49325-supp-v1.zip]

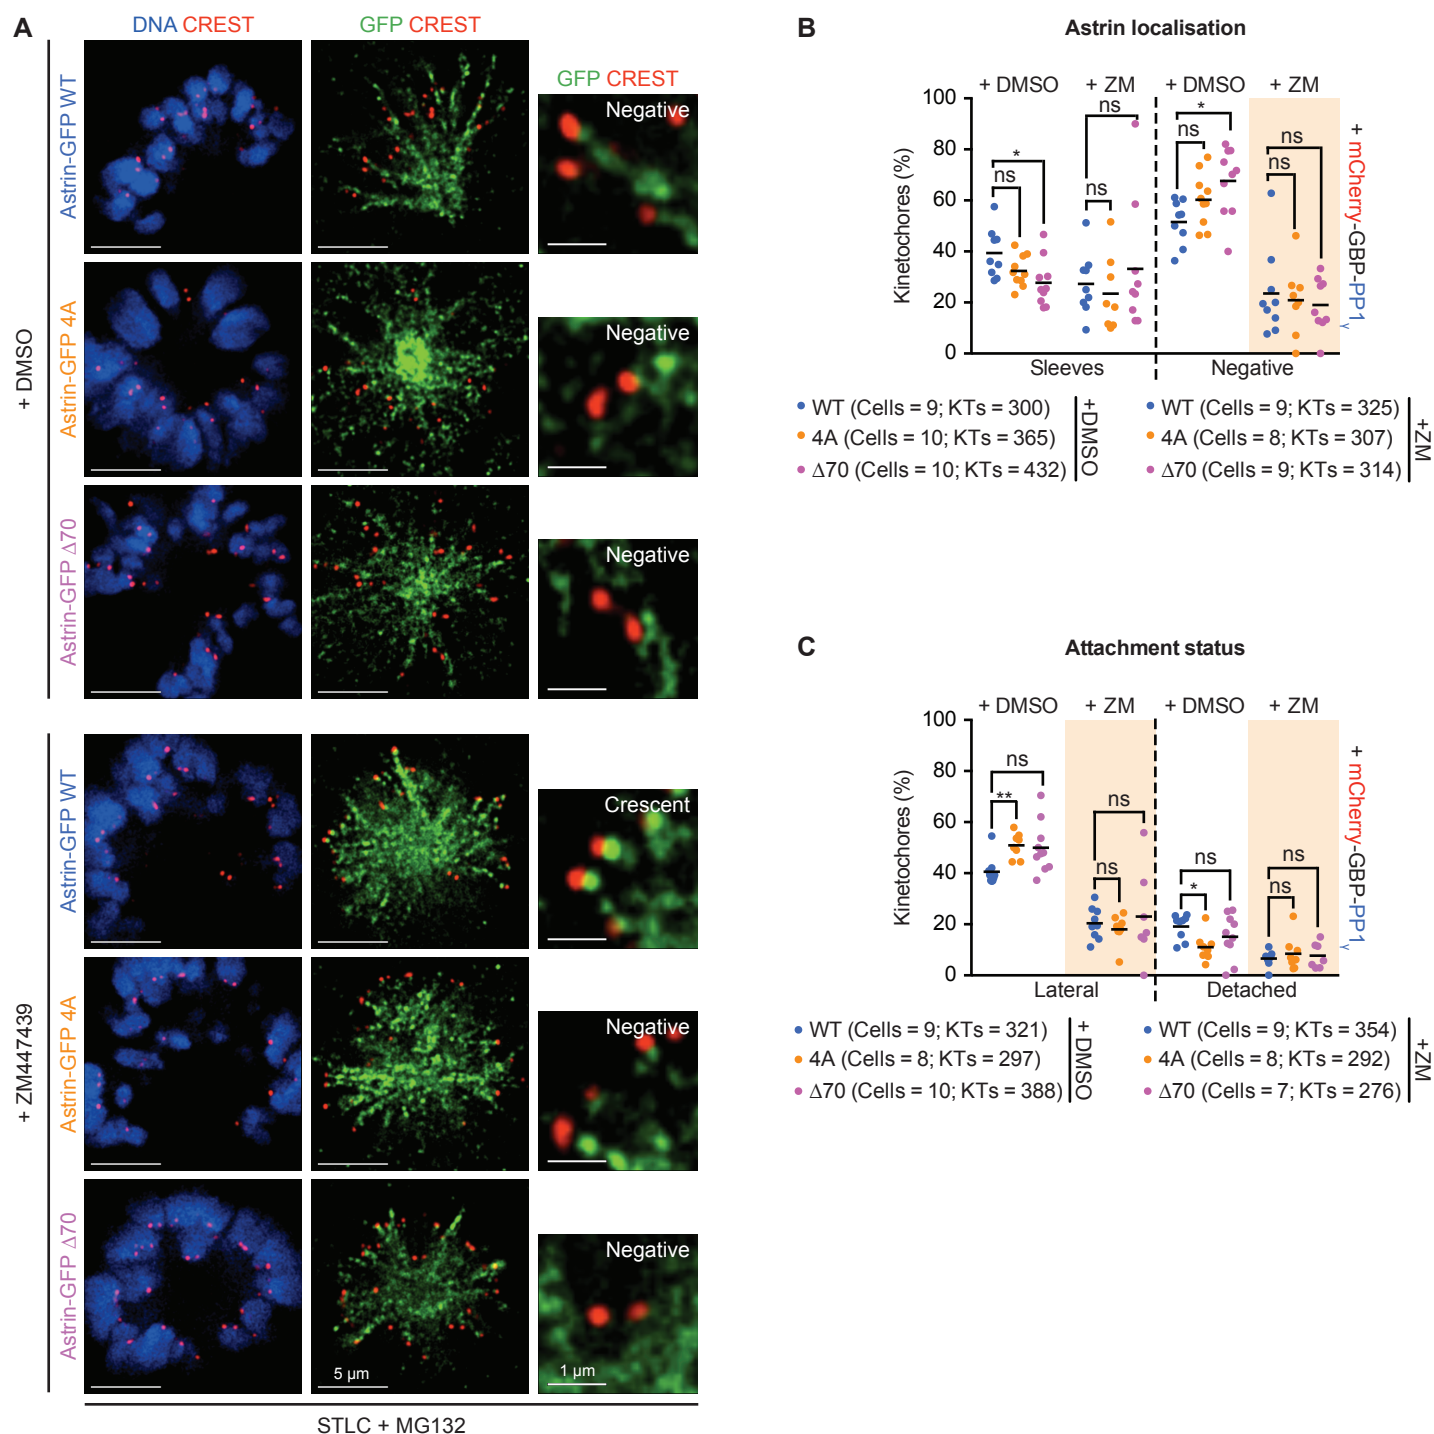

**Figure 7 supplement 1. Aurora-B inhibition does not rescue the kinetochore enrichment defect of Astrin:PP1-docking mutants.**

(A) Representative images of monopolar spindles show GFP-Astrin and SKAP levels at kinetochores of HeLa cells transfected with eukaryotic protein expression vectors encoding Astrin-GFP (WT, 4A or  $\Delta 70$ ). Cells were exposed to STLC for 2h and then supplemented with MG132 and either DMSO or ZM447439 drugs for 15' prior to fixation. Cells were immunostained with anti-GFP antibody and CREST antisera and co-stained with DAPI for DNA. Cropped images highlight Astrin-GFP localisation at kinetochores. (B) Graph of percentage of kinetochores presenting sleeve-like structures or no Astrin signals in cells treated as in Figure 7D and presented in Figure 7E. Graph Each dot represents a value from one cell. Black bars show average across two experimental repeats. (C) Graph of percentage of lateral and detached kinetochores in monopolar spindles of Astrin depleted cells expressing Astrin-GFP (WT, 4A or  $\Delta 70$ , as indicated) along with mCherry-GBP-PP1 $\gamma$  and treated as in Figure 7D and presented in Figure 7F. Beige boxes highlight key changes following Aurora-B inhibition. Each dot represents a value from one cell. Black bars show average across two experimental repeats. "ns" indicates statistically insignificant differences assessed. Scale as indicated.
