# Supplementary material for: Kinetochores attached to microtubule-ends are stabilised by Astrin bound PP1 to ensure proper chromosome segregation
Source: eLife journal article supplement (doi:10.7554/elife.49325), 2019-12-06
Supplement: supp [file elife-49325-supp-v1.zip]

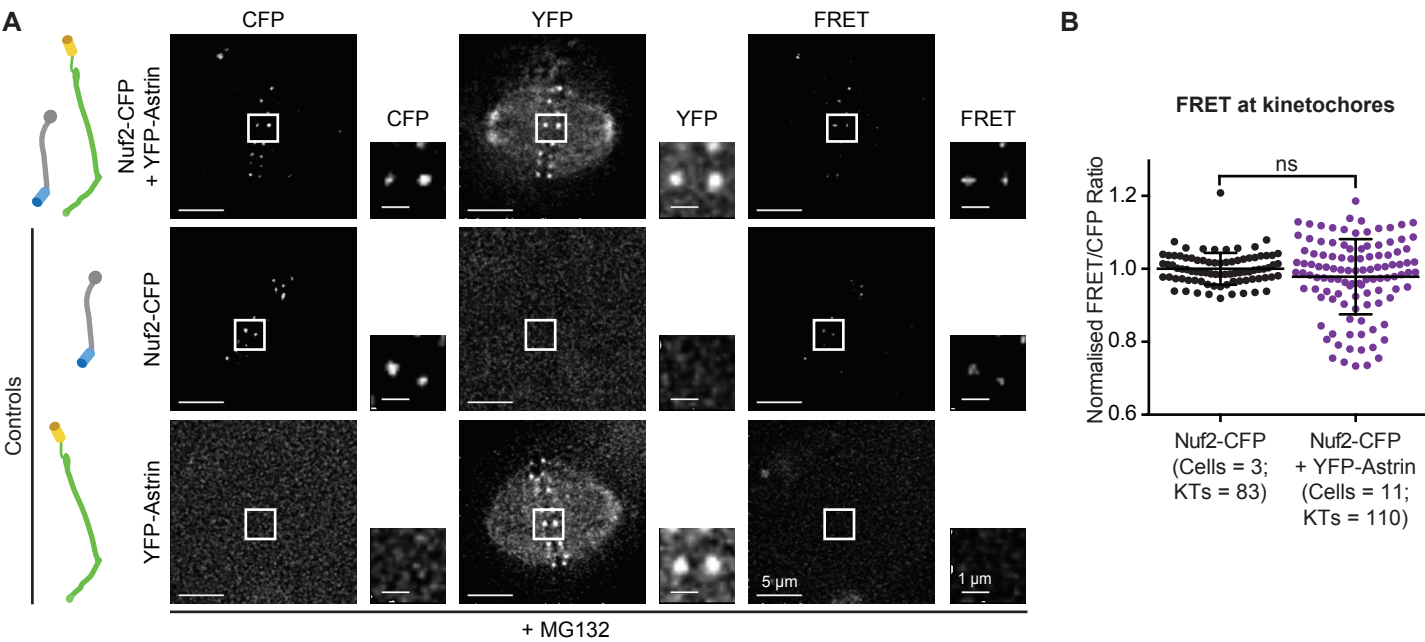

**Figure 1 supplement 2. A stable pool of Astrin localises at metaphase kinetochores**  
(A) Representative live-images of bipolar spindles show poor FRET emission (excitation<sup>CFP</sup>/emission<sup>YFP</sup>) in MG132 treated HeLa cells expressing either Nuf2-CFP or YFP-Astrin singly or both Nuf2-CFP and YFP-Astrin, as indicated (cartoons on left). Cells were arrested in metaphase using MG132. (B) Graph shows FRET/CFP intensity ratios of kinetochores imaged as in A. Each dot represents value from one kinetochore. Black bars and whiskers mark average value and standard deviation, respectively, across two experimental repeats. "ns" indicates statistically insignificant differences. Scale as indicated.
