# Supplementary material for: Kinetochores attached to microtubule-ends are stabilised by Astrin bound PP1 to ensure proper chromosome segregation
Source: eLife journal article supplement (doi:10.7554/elife.49325), 2019-12-06
Supplement: supp [file elife-49325-supp-v1.zip]

Archive with 19 entries (19 files):
- elife_poa_e49325_Figure_3_figure_supplement_3.pdf
- elife_poa_e49325_Figure_1_figure_supplement_2.pdf
- elife_poa_e49325_Figure_2_figure_supplement_1.pdf
- elife_poa_e49325_Figure_5_figure_supplement_2.pdf
- elife_poa_e49325_Figure_3_figure_supplement_1.pdf
- elife_poa_e49325_Supplementary_file_2.unk
- elife_poa_e49325_Figure_8_figure_supplement_1.pdf
- elife_poa_e49325_Figure_6_figure_supplement_1.pdf
- elife_poa_e49325_Figure_3_figure_supplement_4.pdf
- elife_poa_e49325_Figure_1_figure_supplement_1.pdf
- elife_poa_e49325_Figure_6_figure_supplement_3.pdf
- elife_poa_e49325_Figure_4_figure_supplement_1.pdf
- elife_poa_e49325_Figure_5_figure_supplement_1.pdf
- elife_poa_e49325_Figure_7_figure_supplement_1.pdf
- elife_poa_e49325_Transparent_Reporting_File.docx
- elife_poa_e49325_Supplementary_file_1.docx
- elife_poa_e49325_Figure_4_figure_supplement_2.pdf
- elife_poa_e49325_Figure_6_figure_supplement_2.pdf
- elife_poa_e49325_Figure_3_figure_supplement_2.pdf
