# Supplementary material for: Kinetochores attached to microtubule-ends are stabilised by Astrin bound PP1 to ensure proper chromosome segregation
Source: eLife journal article supplement (doi:10.7554/elife.49325), 2019-12-06
Supplement: supp [file elife-49325-supp-v1.zip]

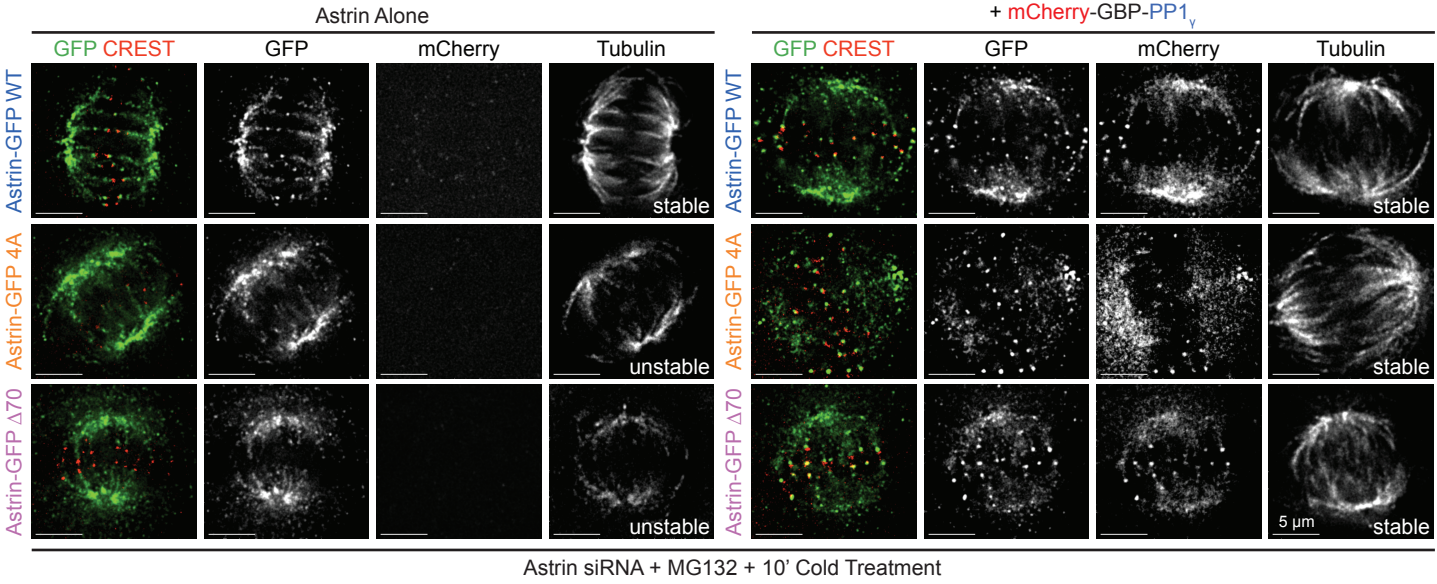

**Figure 6 supplement 2. Active PP1<sub>γ</sub> is required for Astrin localisation and function**

Representative deconvolved images show cold stable microtubules in cells coexpressing mCherry-GBP-PP1<sub>γ</sub> and Astrin-GFP WT or 4A or Δ70 mutants, as indicated. In the absence of mCherry-GBP-PP1<sub>γ</sub> coexpression, cells expressing Astrin-GFP WT but not Astrin-GFP 4A or Δ70 mutants show cold stable microtubules. Cells were exposed to cold for 10 minutes and stained with antibodies against GFP, Tubulin and mCherry along with CREST antisera. Scale as indicated.
