# Supplementary material for: Kinetochores attached to microtubule-ends are stabilised by Astrin bound PP1 to ensure proper chromosome segregation
Source: eLife journal article supplement (doi:10.7554/elife.49325), 2019-12-06
Supplement: supp [file elife-49325-supp-v1.zip]

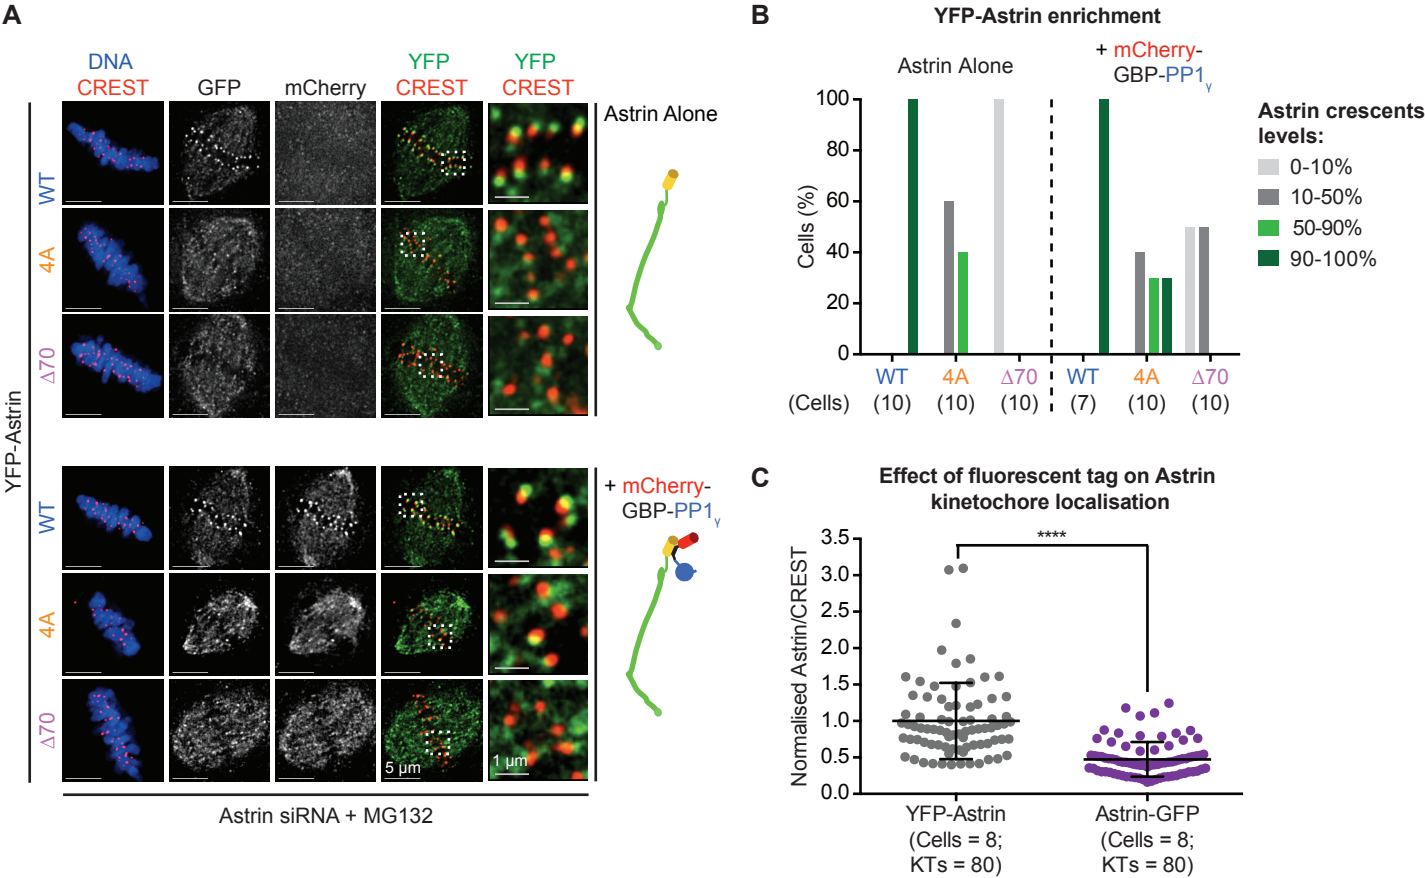

**Figure 6 supplement 1. PP1-delivery away from the C-terminus of Ndc80 is insufficient to rescue Astrin mutant localisation.** (A) Representative deconvolved images show YFP-Astrin intensities at kinetochores of cells treated with Astrin siRNA and expressing YFP-Astrin (WT, 4A or  $\Delta 70$ ) alone or along with mCherry-GBP-PP1<sub>v</sub> (cartoons on the right). Cells arrested in MG132 (1h) were immunostained with antibodies against GFP and mCherry along with CREST antisera and stained with DAPI for DNA. Cropped images are magnified areas boxed in dashed white lines. (B) Bar graph of percentage of cells displaying Astrin-crescents on 0-10%, 10-50%, 50-90% or 90-100% of kinetochores in cells expressing YFP-Astrin (WT, 4A or  $\Delta 70$ ) and mCherry-GBP-PP1<sub>v</sub> and treated as in A. Number of cells is indicated. (C) Graph shows normalised Astrin/CREST signal intensities in HeLa cells expressing YFP-Astrin or Astrin-GFP (both wild type) treated as in A. Each dot represents value from one kinetochore. Black bars and whiskers mark average value and standard deviation, respectively, of kinetochore intensities across cells from two experimental repeats. “\*\*\*\*” indicates statistically significant differences.
