# Supplementary material for: Kinetochores attached to microtubule-ends are stabilised by Astrin bound PP1 to ensure proper chromosome segregation
Source: eLife journal article supplement (doi:10.7554/elife.49325), 2019-12-06
Supplement: supp [file elife-49325-supp-v1.zip › elife_poa_e49325_Figure_1_figure_supplement_1.pdf]

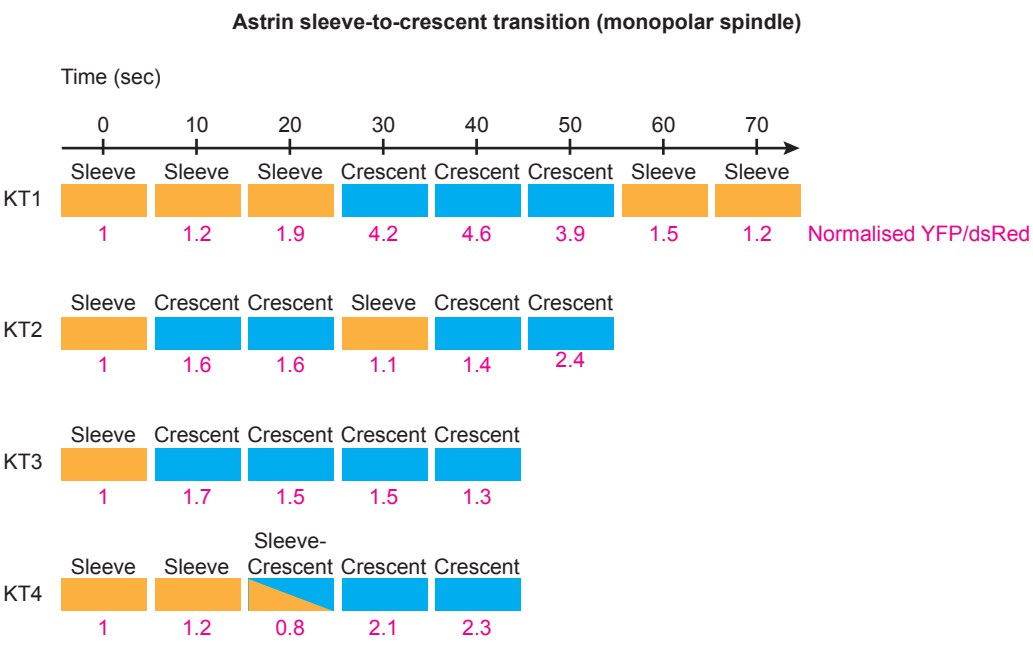

**Figure 1 supplement 1. Transition of Astrin sleeve into a crescent shape at the kinetochore is associated with changes in Astrin intensities**  
Temporal evolution of Astrin signal intensities and shape at four kinetochores selected at random. Intensities of YFP-Astrin were normalised against CenpB-DsRed in cells coexpressing both markers as described in **Figure 1A**. Sleeves refer to Astrin signals at outer kinetochore that extend into microtubule-ends, while crescent refers to Astrin signals restricted to outer kinetochore region. Sleeve-Crescent refers to a timepoint when the shape could not be defined clearly. Measurement of YFP/DsRed signals shows that sleeves are associated with relatively lower Astrin intensities compared to crescents. Following sleeves and crescents at kinetochores of monopolar spindles show transition between the two stages.
