# Supplementary material for: Kinetochores attached to microtubule-ends are stabilised by Astrin bound PP1 to ensure proper chromosome segregation
Source: eLife journal article supplement (doi:10.7554/elife.49325), 2019-12-06
Supplement: supp [file elife-49325-supp-v1.zip › elife_poa_e49325_Figure_3_figure_supplement_2.pdf]

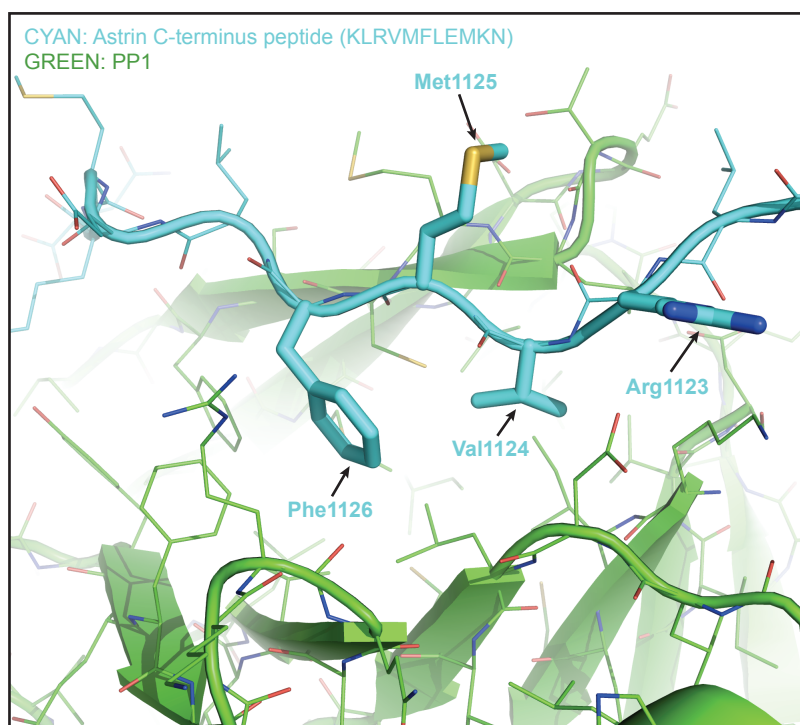

**Figure 3 supplement 2. Model of Astrin peptide based on KNL1 peptide conformation bound to PP1 (PDB code 6CZO).**

KNL1 peptide bound to PP1 complex was used as an input model in flexpepdock, a high-resolution peptide-protein docking software tool, and the predicted structure of the Astrin peptide bound to PP1 is presented in the figure. Astrin peptide (RVMF highlighted in bold) is in Cyan and the cartoon of PP1 is in green. Met (+3 position) in RVMF is in an accessible position potentially allowing almost any other a.a residues except for Pro. Figure produced using PYMOL.
