# Supplementary material for: Kinetochores attached to microtubule-ends are stabilised by Astrin bound PP1 to ensure proper chromosome segregation
Source: eLife journal article supplement (doi:10.7554/elife.49325), 2019-12-06
Supplement: supp [file elife-49325-supp-v1.zip › elife_poa_e49325_Figure_3_figure_supplement_4.pdf]

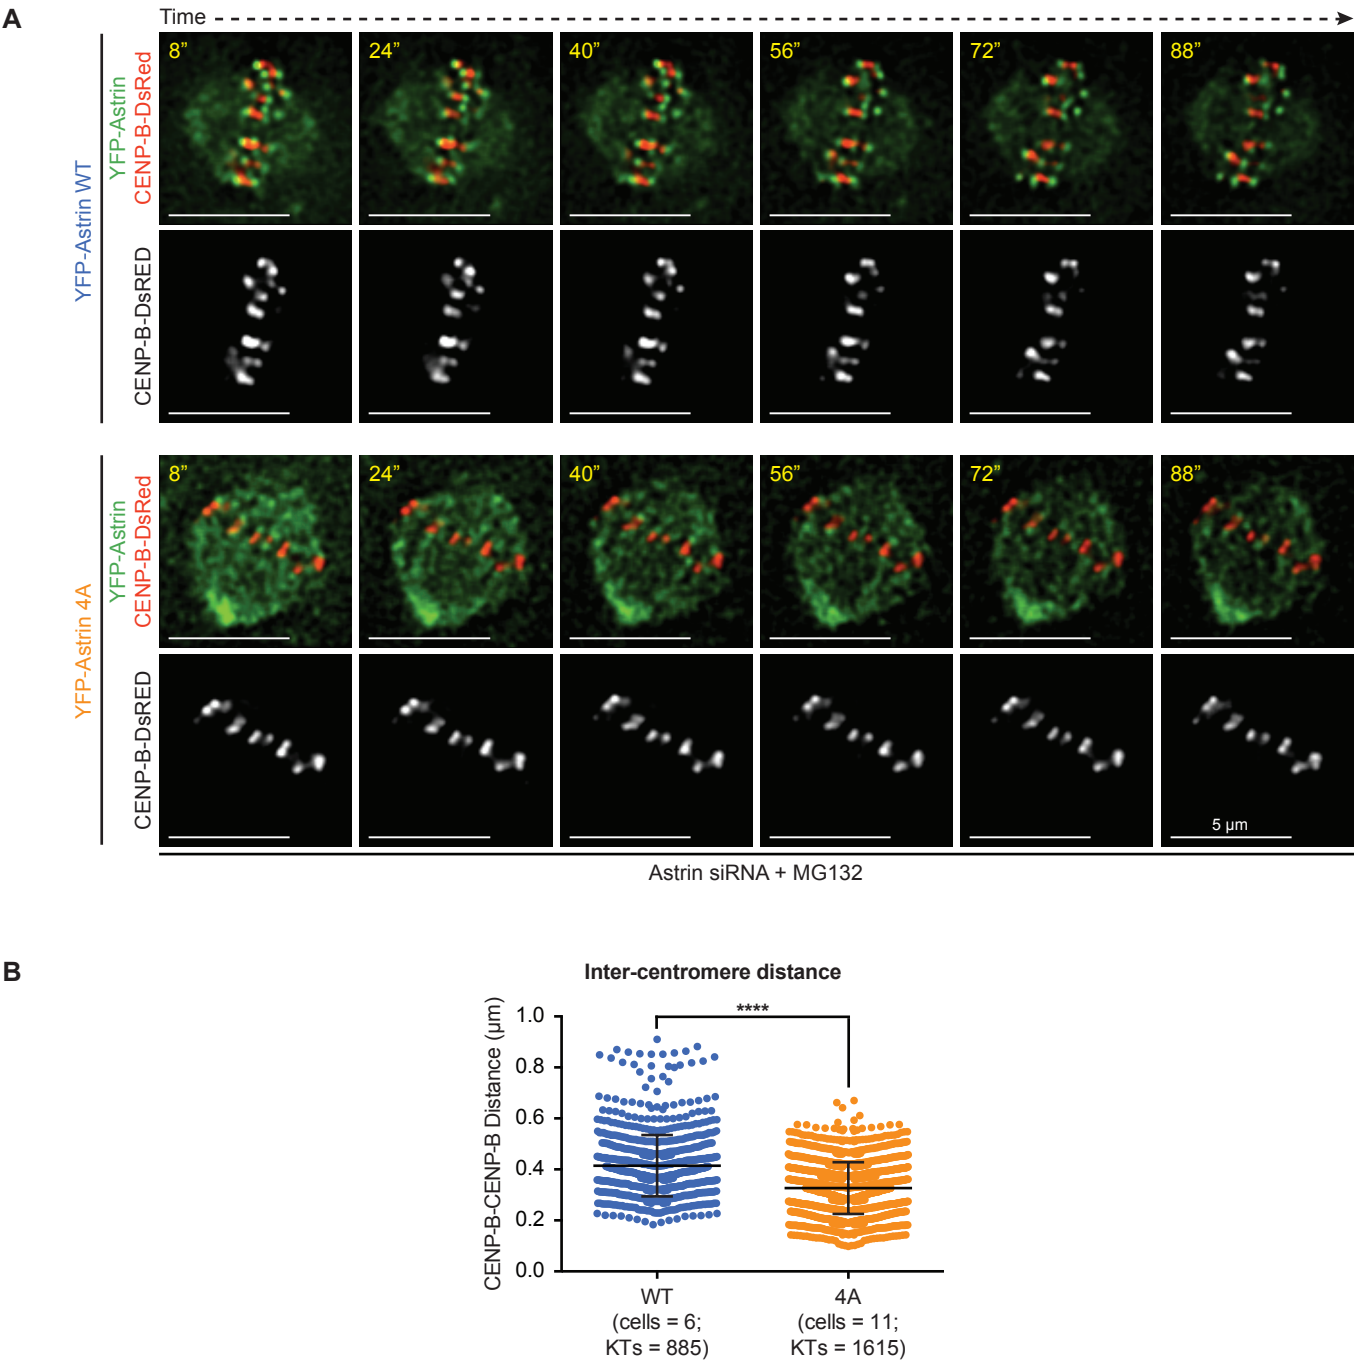

**Figure 3 supplement 4. Inter-centromeric distances reduce following Astrin-4A expression**  
(A) Representative time-lapse images of HeLa cells depleted of endogenous Astrin and coexpressing CENP-B-DsRED and either YFP-Astrin-WT or YFP-Astrin-4A showing dynamic changes in inter-centromeric distances through time. Images were acquired once every 4 seconds for 2 minutes. Cells were MG132 treated 1h prior to imaging. (B) Graph of inter-centromeric distances (in microns) measured using CENP-B-DsRED signals in cells as shown in A. Each dot represents the value from a kinetochore. Data acquired from at least three independent repeats. Number of cells and centromere pairs studied from time-lapse movies indicated. “\*\*\*\*” indicates statistically significant difference.
