# Supplementary material for: Kinetochores attached to microtubule-ends are stabilised by Astrin bound PP1 to ensure proper chromosome segregation
Source: eLife journal article supplement (doi:10.7554/elife.49325), 2019-12-06
Supplement: supp [file elife-49325-supp-v1.zip › elife_poa_e49325_Supplementary_file_2.unk]

>Sus_scrofa|NP_001152783.1
MWRVKKLSLSLSPSPQPGKPAMRTPLRELTLQPGALTSSEKGPPIGHSPTPSLCKLGLQEGSNSSSPLDFVNAKKTDSSSEPFSHPSKWLEACQHESDEQPLHLIPQTNSTPKTSEAAVNPLDDNVVKTMVLVPSPGGQQQDITLEAHLDTMAETNSFSLDEPLRPGDLQTKGVAPCLEDNFSETVPSMSEKPASQDPPSHLLEYPPSSSSEPQLHCSKESLEDGRPEAVPEDLVPSEGSAFLPPSRLWLSPSTALAADFPVSHEDPGEETVEHKAVEEREMSFPTLPEEAELGDQALISNMEDIPSTCLTPNLGEMESQAAPEAAAEEAGRIAMSDMGPWMSPLAWLEKGVNTSAILENLRQSLSLPSSFRDAAIGTTPFSACSVGTWFTPPVQQEKSINTSQTGPVGTKDSTSETEHLLWGRPPDLAALSRHDLEDNLLNSLVILEVLSRQLRDWKSQLTGPHAEVRDSSTQTDTFPCGMSKQPQHLPHSQEIGQALQQARNVMQSCVLVSKELISLLHLSLLHLDEDKTTLSQESRRAETLVSCCFDVLKKLRARLQHLKAEREEAKQREELALRGKDVAETVLEAFCAHAGQRISQLKQDLASMGQFRGLLKETQTQLAGLHIEQEELAQQTASLTSALHQDWISMHLDYVTWTALLSRFQQLAEKFTAKSQQTLQKRDAAIEEKEQVSRELEQVSSHLEDYKSQREQLELENSRLATDLRAQLQILASMESQLKELQSQHAHCIQDLATKDELLCQLSQSSEERAVQWQREEMALKHTQAELQQQQAVLAKEVQDLKETLEFAEQENQVAHLELGQVECQLKTTLEVLRERSLQCEDLKDTVENLRAELASIIAEKQQQDLEKACQCSQELGVLTEQLQSLTLFLQTKLKETAEPETLPISTAYALSQEHPPPADSAFLGSILTAVADEEPESAPVPLLGSDKSAFTRVASIVSLQPTEPPGIEKSLAEMSTLILELQSLCSLLQESKEEAVRTLQRKICDLQAELQSQEEQHQEAQRAKEADIEKLNQALCLRYKNEKELQEVIQQQNKKILEQIDKSGELIRLREEVAQLTRSLRRAETETAVLRETLAGQLNPDCQPMATNWIQEKVWLSQEVDKLRVMFLEMKNEKAKLTVKFQSHRNILEENLRRSDKELKKLDDIVQHIYQTLLSIPEVVKGCKELQGLLEFLS
>Rattus_norvegicus|NP_001037689.1
MWRVKTLNLGLSPSPQSGKPAMRTPLRELKLQPEALADSGKGPMFSSLTPYLRRLDLKERRNSSSPVNFVNAENSSPVDFVNTENTSPVDFDNTENNFLSEQFSHPSEYIEACQRESDLTPESSSPFNTLEKAVEAMDDFVAEPIDDGIVKTMVLLPFSLGQQQDLMLQAHLDTTAERNKSSLKESLGLEDLVEKEAAPCVEDSLPETVAIRPEQPISQDPPLRDSNTEAAPAGSVPSENVLGFTVACLSPSTVLTKDFSVDHVDPGEETAENRVIQEVEKSFLALPEEAGLGDQALAVNAEDVSSLYLSSSLVEMGPQEAPGPTAEDASRIPDLESETWMSPLAWLEKGVNTSVMLQSLRQSLPFSKSVLQDAAVGNTPHSTYSVGTSFTPPVPLEVGTKDSTSETERLLLGCRPPDLAALSRHDLEENLLNALVLLEVLSHQLQAWKSQLTVPSRQAQDSSTQTDSSAAVVTKTPKHLQDSKEIRQALLQARNVIHSWGLVSRDLMSLLHLSLTHVQDDRVTVSQESQRAETLVSSCSRVLKKLRAKLQSLKTEWEEARHREEMALKGKDAAEAVLEAFRAHASQRISQLEQGITSVQEFRGLLQEAQTQLIGLHTEQEELAQHTVSLTSALQQDWTSVQQNYGTWAALLSRSRELTKKLTAKSRQALQERDAAIEEKDQVVKEVEQVSAHLEDCKGQIEQLKLENSRLTADLSAQLQTLASTENELKELQSQHSHCVQDLAMKDELLCQLTQSNKEQAAQWQKEETELKHRQAELLQQKAVLAKEVQDLRETMEFVDEESQVAHLELGQIESQLKATLEVLRERSLQCETLKDTVESLRAELASTEAKHEQQALEKTHQHSKELCLLAEQLQSLTLFLEAKLEENKAESDIILPSTGCAPAQEHPPSSDSSVSEQIPTAVVDEVPEPAPVPLLGSVKSAFTRVASTAPFRPTETPALEKSLAEMSAVLQELQRLCALLQESKEEAVGVLQREICELHTRLQAQEEEHQEAQKAKEADIEKLNQALCLRHKNEKELLEVIQKQNEKILGQIDTSGQLINLREEVTQLTRLLRRAETETKVLQEALEGQVDPSCQLMATNWIQEKVFLSQEVNKLRAMFLEVKNEKKQLMDKYLSHRHILEENLRRSDTELKKLDDTIQHIYETLLSIPEVVKSCKELQGLLEFLS
>Cavia_porcellus|XP_003469777.1
MWRVKKLNLSLSPSPEPGKPAMRTPFKELNLQPSDFTNSGQCFALCSTLTPSLCKLGLLEGSNNSSLLDFVNAKSTDSPSEQYSYASKWTEACQHESDKQLLELTPQTNSTPKTFEEEIGPVEDYVVKNMVLESSPGGQEQDIVLEAHSDTMAETNSSTLTESLRPGELVRKEVAACVEDSFLEVVAATPEKPAFQDSPSHVLDSSSNRCSEQQLHCPKESLRDNRTECVSEDLVQPESNDFLLSSVLWLSPSPGLATDFPTNHVDQGDEIVEDRAIEEREMNSPTLPEKAELGDQALVSHVENVPPTCLTPNPVALESQAAPSPVEDAGRILGCDSETWMSPLAWLEKGVNTSVMLENLRQSLCLPTVLQDAAIGTTPFSACSVGTWFTPPAPQENSTNQSRLGPQSTKEKSASETQHRLWGHHPPDLTTLSRHDLEDNLMNSLVILEVLIRQLQDWKNHLAVPHLKAQDCSTQTDASPPWVPKEPKHLQEGQKIGQALQQTSNIMQSWVLASNELTTLLHLCLLHVEEDKTAVSQESWLAETLISCCFDMLKKLKAKLQSLKTEMEEARHREEVALRGKDVAETVLEAFCAHASQRISQLEKDLKFTGEFRSLLQEAQAHLVGLHTEQGELARHAVSLTSTLEQDWTSMHLDYVAWTDLLSQYQQLAEKLTTKSRQALQDYNVAVEEKQQISRELAQTSTHLEDCKGQIEQLNLEKGRLATDLRAQLQMLADTDRQLKELQNQHAHCTQDLATKDELLCQLTQSNEEQAAQWQKEKMVLKQTRAELEHQQAVFAKELQDLKETLQFADQESQIAHLELGEVECQLKTTLDVLRERSLQCETLKDTVENLKAELASTIAANQEQDLQKTRQYSQELGVLTKQLQSLTLFLQTKLKEAAEPETLSLSTTHALAEEHPLPNGRVSVGSIWTADTSEEPESAPVSLLGSGKSAFTRVASVVSLHPPETPDIEMNLAEMNSKLLELHSLCTLLQESKEEAIGSLERKICALQGRLQAQEEQHQEAQKAKEADIEKLNQALCLRYKNEKELQEVIHKQNEKILEQIDKSGELISLREEMTQLTRSLRRAETETKVLQETLAGQLDPNCEPEATNWIQEKLWLYQEVDKLRMMFLEVKDEKAKLMVKFQSQRNILEENLRRSDAELTKLDEIVQHIYKTLLSIPEVVQSCQKLQGLLEFLS
>Castor_canadensis|XP_020018534.1
MWRVKTLNVGLSPSPQPRKPAMRTPLRELILQPGALTNSRVGPPMCSSLTPSLCNLGLQEDSNNSSPMDFVNARSTNFPSECLEACQHESDEQPLDPTPQTNSPPKTSEEALDQKDDYVVKTVVLVPSPVVQQQDMTLKTHLDGILEKNNSVIELLSPGDLVRKEMALCMEENFLEVVASMPEEPTFQDFPSHPLEYSPKPCSEQQLHYSKENLRDKRTEVVPEDLVLSESNAFSPSSMLWLSPSTAMSADFPINHVDPGKEMVEHRVIEERKMSFPILHEKIELGDKALIPNVEDVPSTCLTSNPVEMESQAAPGPAVEDAGRILCSDTETWMSPLAWLEKGVNTSVMLENLRQSLSLPSVLQDAPIGSTTLSTCSVGTWFTPPAPQEKTTGTKGTKDGTSETEHLLWGCPPDLTALSRHDLEDNLLSSLGLLEVFSRQLQAWKSRLAIPHPETRDSATQTETSPSRVNKKLQHLQESQDIRQALKQARNVMQSWVLASKELISLLHLSLLHVEEDRMTMSQESQHAKTLVSCCFDVLKKMRPKLQSLSTEREEARHREEMALKGKDAAETVLEAFCAHASQRISQLKQDSTSMQEFRGLLQEAQTQLVGLQTEQEELAQQVVSLTSTLQQDWTSMQLDYGTWTALLNRSQQLTEKLTTKSRQALQERDSAIEEKQQVSRELEQVSAHLEDCKGQIEQLKLENSRLVTDLRAQLQMLASTASQLKELQSQHASFAQDLAMKDELLHQLTQSNEKQAAQWQKEEMALKQIKAELQQQKAVLAKEVQELKETLEFADQESQVAHLELGQVEYQLKTTLEVLRERSLQCENLKDTVENLKAHLASTIAENQEQALEKAHQYSQGLGLLTEQLQSLTLFLQTKLKEKTEVETLLLSTDCAPTQEIPPPNESASMGNISTAVADEESESAPVPLLGSDKSAFTRVTSVVSLQPTETPGLEKSLAEMRTTLLELQSLCTLLQESKEEAIEVLQRKICDLQGRLQAQEEQHQESQKAKEADIEKLHQALCLRYKNEKELQEVIQKQNEKILEQIDKNGELISLREEVIQLTHSLRHAETETKVLKETLAGQVDPTCQPVVTNWIQEKVCLSQEVDKLRLMFLEMKNEKAKLVLKYQSHRNILEENLRRSDTELKKLDDIVQHIYETLLSIPEVVRNCKELQGLLEFLS
>Desmodus_rotundus|XP_024420947.1
MWRVKKLSPSPQPGKAAMRTLLQELNLQPSALTGSGKRPQTGYSLTPSLCKPGLQEGNNNASLVDFENAKMTDSPPEQFIHPSKWLETCQHESDEQPLNLIPQNNSTPKTSEEAVDPPDNNVVKTSVCVSSPGGQQQDIALEAHLNIVAETNRFSLGEPLRPGDLLRKEVEPCMEDTFSEVVPAVLEKLTFQDPPSHLLECPPSPCSEQQLQCSKESLTDKRTDAVPEDFVSSESNAFLPTSTLCLPSSTSLAADFPVSHVDSGKETEIVEHRVIEEREMSFSTLPEEAELGDKALVSNMEDIPSTCLTPNPGEMESQAAPGPAVEDAGRILISDTEPWMSPLAWLEKGLNTSVMLENLRQSLSLPSVLRDAATGTTPFPTCSVGTWFTPPAPPQEKSTNTSQTGPVGTKDSTSEGEHLLWGHPPDLTALSRHDLEDTLMNSLVILEGLSRQLRNWKSQLTTPHPEVQDRSTQTATADTSVSGVNKKPQHLRKTQEIEQTLQQTRNVMQSWVLVSKELVSLLHLSLLHLEEDKTTVSQESQRTETLVSCCFDMLKKLRARLQSLKTEREEAKHREEMALRGKDAAETVLEAFCAHASQRISQLEQNLASMGEFRGLLKETQTQLVGLHTEQEELAQQAVSLTSILQQDWTSMQLDYITWTALLSRSRQLTEKLTAKSRQMLQERDAAIEEKQQVSRELEQVSTQLEDCKGQIEQLELENSHLATDLQAQLQILASTQSQLKELQSQHAHCTQDLATKDELLCQLTQSNEQQATQWKKEEMALKHMQTELQQQHAVLAKEVQDLKETLEFADQENQVAHLELGQVECQLKTTLEVLRERSLQCEDLKDTVENLKAKLASTIAENEEKELEKRCQYAQELRVLTKQLQSLTLFLQTKLKEKAEPEILLKSTGCVSAQEHPPPSDSTSDSTFSGNILTVMADKESESAPEPLLGSDKSAFTRVASMVSLKPTEIPGMEKSLEEMSTMTLELQSLCSLLQESKEEAVRALQQKICDLQARLQAQEEEHQEAQKAKEMDIEKLNQALCLRYKNEKELQEVIQQQNEKILEQIDKSGELISLREEVTQLTRSLRRAETETKVLQETLAGQLDPNCQPMATNWIQEKVWLSQEVDKLRVMFLEMKNEKAKLMVKFQSHRNILEENLRRSDKELKKLDDIVQHIYETLLSIPDVVRGCKELQGLLEFLS
>Bos_taurus|NP_001192478.1
MWRMKKLNLSLSPSPQPGKAAMRTPLRELALQPDAPTNSGKGPPHSPTPSPCKLGLQEGSNNSSPPDFVNARKTDSPSEQFGHPSKWLEAYQHESDEQPLNLIPQTNSTPKTCEKGVDPRDNNVVKTMVLVPSPGRQQQDITLADRLDSMAEGNSFSLDEPLRPGDLLRKGVDFCMEDSFSETVPGMPEIPAFQDPPSQLLESPPNPCSEQQLHCSKESLKDRSTEAEPEDLVPSESNALLPSSLLWLSPSTALAADCPVSHVDPEGDILEHRAIEERKMSFPTLPEEAELGHQALVSNTDDIPSTCPSPNPGEMESQVVPGPAGKDASGIPGSDVGPWMSPLAWLEKGVNTSVMLENLRQSLSLPSAFQNAAIGTTPFSACSVGTWFTPPAQQERSTNTSQTGLVGTKDSASETEHLLWGRSPDLTALSRHDLEDNLLNSLVILEVLSRQLRDWKSQQSGPHPEVRDSSTQTDTLPNEMSKKPQHLQESQEVGQALQQARNVMQSWVLLSRELISLLHLSLLHLDEDKTALSQETRRAETLVSCCFDVLKKLKARLQSLKAEREEAKHREELALRGKDVAETVLEVFCAHASQRISQLQQDLASMGKFRGLLKETQTQLVGLHTEQEELAQQTASLTSALQQDWIAMQLDYVTWTALLSRFRQLTEKFTAKSRQTLQERDAAIEEKQQVSRELEQVSSHLEDCKSQLERLELENSRLAADLQAQLQILASTESQLKVLQSQHAHCTQDLAMKDELLCRLTQNSEEQTAQWQKEEMALKHVQAKLQQQQAVLAKEVQDLKETLEFAEQENQVAHLELGQVECQLKTTLEVLRERSMQCEGLKDTVENLKVKLASIVAETRQQDLEKMRQYSQELGVLTEQLHSLTLFLQTKLKEKAEPETLPISTASAFSQEHPPPSDSTFLGSPQTAEADEDPESTPVPLLGSDKSAFTRVASTVSLEPTETPGIEKSLAEMGTKTLELQSLCSLLQESKEEAVRILQQKICDLQAQLQAQEEQHQEAQKAKEADIEKLNQTLCLRYKNEKELQEVIQQQNEKILEQIDKSGELIRLREEVTQLTRSLRRAETETKVLQETLAGQQNPDCQPMDTNWIQEKVWLSQEVDKLRVMFLEMKNEKAKLMVKFQSHRNILEENLRRSDEELKKLDDTVQHIYETLLSIPDVVNGCKELQGLLQFLS
>Bubalus_bubalis|XP_006042251.2
MWRMKKLSLSLSPSPQPGKAAMRTPLRELALQPDAPTNSGKGPPHSPTPSPCKLGLQEGSNNSSPPDFVNAKKTDSPSEQFDHPSKWLEAYQHESDEQLLNLIPQTNSTPKTCEKGVDPRDNNVVKTMVLVPSPGRQQQDITLADRLDSMAEGNSFSLDEPLRPGDLLRKGVDFCMEDSFSETVPGMPEIPAFQDPPSQLLESPPNPCSEQQLHCSKESLKDRSTEAEPEDLVPSESNTLLPSSLLWLSPSTALAADCPVSHVDPEGDILEHRAIEEREMSFPILPEEAELGHQALVSNTDDIPSTCPSPNPGEMESQVAPGPAGKDASGIPGSDVGPWMSPLAWLEKGVNTSVMLENLRQSLSLPSAFQNAAVGTTPFSACSVGTWFTPPAQQERSTNTSQTGLVGTKDSASETEHLLWGHSLDLTALSRHDLEDNLLNSLVILEVLSRQLRDWKSQQSGPQPEVQDSSTQTGTLPNEMSKKPQRLQESQEVGQALQQARNVMQSWVLLCRELISLLHLSLLHLDEDKTALSQETRRAETLVSCCFDVLKKLKARLQSLKAEREEAKHREELALRGKDVAETVLEVFCAHASQRISQLQQDLASMGEFRGLLKETQTQLVGLHTEQEELAQQTASLTSALQQDWIAMQLDYVTWTALLSRFRQLTEKCTAKSRQTLQERDAAIEEKQQVSRELEQVSSHLEDCKSQLERLELENSRLAADLRAQLQILASTESQLKVLQSQHAHCTQDLAMKDELLCRLTQNSEEQAAQWQKEEMALKHVQAKLQQQQAVLAKEVQDLKETLEFAEQENQVAHLELGQVECQLKTTLEVLRERSMQCEGLKDTVENLRVKLASIVAETRQQDLEKMCQYSQELGVLTEQLHSLTLFLQTKLKEKAEPETLPISTASALSQEHPPPSDSTFLGSPQTAEADEDPESTPVPLLGSDKSAFTRVASTVSLEPTETPGIEKSLAEMGTKTLELQSLCSLLQESKEEAVRTLQQKICDLQAQLQAQEEQHQEAQKAKEADIEKLNQTLCLRYKNEKELQEVIQQQNEKILEQIDKSGELIRLREEVTQLTRSLRRAETETKVLQETLAGQQNPDCQPMDTNWIQEKVWLSQEVDKLRVMFLEMKNEKAKLMVKFQSHRNILEENLRRSDEELKKLDDTVQHIYETLLSIPDVVNGCKELQGLLQFLS
>Equus_caballus|XP_001918373.1
MWRVKTLNFSLSPSPQPGKPAVRTPLRELTLQPSALTSSGKRPPLCSSLTPSLCKLGLQESNSNSSPLDFVNAKRKDSPSEQFSHPSKWLEACQHESDEQPLDLIPPTNSTPRICEEAVDPVDDSVVKTMVLIPFPVGQQQDITLEAHLDTMAETNSIILNEPLRPGDLLREGVAPCMEDSFSEVVPAMPEKPTFQDPPSHLLEYPPNPCSEQQLPFSKEGLMDRGTEAVPEDLVLSESNAVLPSSMLWLSPSTALAADFLVSHVDPGEETIEHRAVEGREMSFPTTLPEEAELGDQALVSNMEDILPTCLTPNLGEMESQVAPGPAVEDAGRILISDTGPWMSPLAWLEKGVNTSVMLENLRQSLSLPSVLRDAAIGTTPLSTCSVGTWLTPPAPQEKSTNTSQTGLVGTKDSISETEHLLRGHPPDLTALSRHDLEDNLLNSLVILEVLSCQLRDWKTKLTVPHPEVQDSSTQTDTSPSEISKKPQHLQESQEIGQALQQARNVMQSWVLVSKELISLLHLSLLHLEEDKTTVSQESRRAETLVSCCFDVLKKLRARLQSLKAETEEAKHREEMALRGKDVAETVLEAFCAHASQRISQLEQDLASMGEFRGLLKETQTQLVGLHTEQEELAQQTVSLTSTLQQDWISMQLDYITWTALLSRSRQLTEKLTAKSRQTLQERDAAIEEKQQVSRELEQVSTHLEDCKVQVEQLKLENSHLATDLQAQLQILTSMESQLKELQSQHAHCTHDLAMKDELICQLTQNNEEQAAQWQKEEMALKHMQAELQQQQAVLAKEVQDLKETLEFADQENQVAHLELGQVEYQLKTTLEVLRERSLQCEDLKDTVENLKAKLASTIAENQEQDLEKTRQYSQELGVLTEQLQSLTLFLQTKLKEKADLETLLISTACAPAQEHPLPTDSAFLGSILTAVADEEPEAAPVPLLGSDKSAFTRVASMVSLQPTETPGMEKSLAEMTTMTLELQSLCSLLQESKEEAVRTLQQKICDLQARLQVQEEQHQEAQKAKEADIEKLNQALCLRYKNEKELQEVIQQQNEKILEQIDKSGELISLREEVTQLTRSLRRAETETKVLQETLAGQLNPDCQPMATDWIQEKVWLSQEVDKLRVMFLEMKNEKAKLMVKFQSHRNILEENLRRSDKELKKLDDIVQHIYETLLSIPEVVRGCKELQGLMEFLS
>Ovis_aries|XP_027831035.1
MWRVKTLNLSLSPSPQPGKAAMRTPLRELALQPDAPTNSGKGPPHSPTPSPCKLGLQEDSNNSSPPDFVNAKKTDSPSEQFSHPSKWLEAYQHESDEQPLNLIPQTNSTPKTCEKGVDPLDNNVVKTMVLVPSPGRQQQDIMLADRLDIMAEGNSFSLDEPLRPGDLLRKGVAFCTEDSFSETVPGMPEIPAFQDPPSQLLESPPNPCSEQQLHCSKESLKDRSTEAEPEDLVPYESNTLLPSSVLWLSPSTALAADCPVSHVDPEGDILEHRAIEEKEMSFPTLPENAELGHQALVSDTDDIPSTCPSPNPGEMESQVAPGPSGKDASSIPGSDVGPWMSPLAWLEKGVNTSVMLENLRQSLSLPSAFQNAAIGTTPFSACSVGTWFTPPAQQERSTNTSQTGLVGTKDSASETEHLLWGRSPDLTALSRHDLEDNLLNSLVILEVLSRQLRDWKSQQSGPHPKVQDSSTQTDTFPNEISKKPQHLQESQEVGQALQQARNVMQSWVLLSRELISLLHLSLLHLDEDKTALSQETRRAETLVSCCFDVLKKLKARLQSLKAEREEAKHREELALRGKDAAETVLEVFCAHASQRISQLQQDLASMGEFRGLLKETKTQLVGLHTEQEELAQQTASLTSALQQDWIAMQLDYVTWTALLSRFRQLTEKFTAKSRQTLQERDAAIEEKQQVSRELEQVSSQLEDCKSQLERLELENSRLAADLQAQLQILASTESQLKVLQSQHAHCTQDLAMKDELLCRLTQSSEEQAAQWQKEEMALKHVQAKLQQQQAVLAKEVQDLKETLEFAEQENQVAHLELGQVECQLKTTLEVLRERSMQCEGLKDTVENLKVKLASIVAETQQQDLEKMCQYSQELGVLTEQLHSLTLFLQTKLKEKAEPETLPISTASALSQEHPPPSDSTFLGSAQTAEADEDPESTPVPLLGSDKSAFTRVASTVSLEPTESPDIEKSLAEMGTKTLELQSLCSLLQESKEEAVRTLQQKICDLQAQLQAQEEQHQEAQKAKEADIEKLNQTLCLRYKNEKELQEVIQQQNEKILEQIDKSGELIRLREEVTQLTRSLRRAETETKVLQETLAGQQNPDCQPMDTNWIQEKVWLSQEVDKLRVMFLEMKNEKAKLTVKFQSHRNILEENLRRSDEELKKLDDTVQHIYETLLSIPDVVKGCKELQGLLQFLS
>Ursus_arctos|XP_026373494.1
MWRVKNLNVSLSPSPQPGKPAMRAPLRELILQPGALTNSGKGPPICSSPTSALCKLGLQEGSNTSSPLDFVNAKRTDSPPEQFGHPSKWLEACQHESDEQPLDMNPQTNSTPKISEEAVDPLDNNVVKTIVLVPSPVGQQQDVALEAHLDTMTETNSISADETLRPGDLLREWVAACKEDNFSEVVPTLPEKPIFQHPPSHVLECLPNPCSEQHCSKESLRGGRTEAVAEDLVPSESNIFLPSSMLWLSPSTALAADFPASHVDPGEEIVEHRSIEERELSFPTLPEKAELEDQALVSYTEDTPSTCLTPNPGEMESQAAPGPAVEDAGRVLISDTGPWMSPLAWLEKDVNTSIMLESLRQSLSLPSVLRDAAISTTPFPTCSVGTWFTPPAAQEKSTNTSQADPAGIKDGTSETEHLLWGNHPPDLTALSRHDLEDNLLNSLVILEVLSRQLRAWKSQLTVPHSEVQDSSTQTDTSPNGISKKPQHLQESQEIGQALQQARNVMQSWVLVSKELISLLHLSLLHLEEDKTTVSQESRRAETLVSCCCDVLKKLKTRLQSLKAEREEAKHKEEMALRGKDAAEAVLEAFCAHASQRISQLEQDLASMGDFRGLLKETQAQMVGLHAEQEEVAQQTASLTSNLQQDWISMQLDYVTWTALLSRSQQLTEKLKAKSQQTLQERDAAIEEKQQVSRELEQATTHLEDCKGRIEQLELENSRLATDLQAQLQSLASMESQLKELQSQHARCTQDLAMKEELFCQLTQSNEEQTAQWQKEEVALKHMQAELQQQQAVLAKEVQDLKETLEFADQENQVAHLELGQVECQLKTTLEALRERSLQCEDLKDTVENLKANLASTIAENQEQHLEKTRQYSQELGVLTEQLQRLTLFLQGKLKKAEPETPLLSTACAPAQEYPPPADSAFLGSVLTAMADEEPEAAPVPLLGSDKSAFTRVASMVSLQPTEIPGMEKSLAEMGTVTLELQSLCSLLQESKEEAVRALQQKICDLQARLQAQEEQHQEAQKAKEADIEKLNQALCLRYKNEKELQEVIQQQNEKILEQINRSGELISLREEVTQLTRSLRRAETETKVLQETLAGQLNPDCQPMATNWIQEKVWLSQEVDKLRVMFLEMKNEKAKLMVKFQSHRNILEENLRRSDKELKKLDDIVQHIYETLQSIPEVVRGCKELQGLLEFLS
>Puma_concolor|XP_025772934.1
MWRVKKLNLSLSPSPQSGKPAMRTPLRELTLQPGALTNSGKGPPGCYSPTSSLCKLGLQEGNNNASPVDFVNAKRTDSPSEQFSHPSKWLEACQHESDERLIDLNPQTNSTPKTSEEAVDPLDNNVVLVSSPVGQQQVTLEAHLDSMTETNSFSPDESLRPGDLLREGVAACIEDSFSEVVPATSEKCTFQRPPSHVLECLPNPCSGQQPYCSKESLRDDGTEAVPEDLVPSERNTFLPSSMLWLSPSTALAADFPGTHVDPGEEIVEHRAVEERELSFPTLPEEAELGEQALVSNMEDIPSTCLTPNPGEMESQAAPSPAVKDAGRILVSDTGPWMSPLAWLEKGVNTSVMLENLRQSLSLPSVLRDAAIGTTPYPTCSVGTWFTPPAAQEKSTNTSQTGPVDIKDGTSETEHLLWGHPPDLTALSRHDLEDNLLNSLVILEVLSHQLRDWKRQLTVPHSEVQDSSTQTDTSPSGISKKPQHLQESQEIGQALQQARNAMQSWVLVSKELISLLHLSLLHLEEDKTTVSQESRRAETLVSCCFDVLKKVKARLQSLKAEKEEAKHKEEMAVRGKDAAETVLEAFCARASQRISQLEQDMASLGEFRGLLKDTQTQLVGLHTEQEELGQQTASLTSNLQQDWISMQLDYKTWTALLSRSRKLTEKLTAKSRQTLQERDAAVEEKQQVSRELEQVSTHLEECKGQIEQLELENSRLATDLRAQLQILASVESQLKELQSQHAHCTQDLAVKDELVCKLTQSNEEQATQWQKEEVALKHMQAELQQQQAVLTKEVQDLKETLEFADQENQVAHLELGQVECQLKTTLEVLRERSLQCEGLKDTVENLKAKLASTVAENQEQNLEKTRQYSQELGVLTERLQRLTLFLQAKLKEKAEAETLPVSTACAPTQEYPPPADSAFLGNILTAMADEEPEAAPVPLLGSDKSAFTRVASMVSLQPTETPGMEKSLAKMGTMTLELQSLCSLLQESKEEAIRTLQRRICDLQARLQAQEEQHQEAQKAKEADIEKLNQALCLRYKNEKELQEVIKQQNEKILEQIDKSGELISLREEVTQLTRSLRRAETETKVLQETLAGQLNPDCQPMATNWIQEKVWLSQEVDKLRVMFLEMKNEKAKLMVKFQSHRNILEENLRRSDKELKKLDDIVQHIYETLLSIPEVVRGCKELQGLLEFLS
>Pongo_abelii|A0A2J8TMM4
MWRVKKLSLSLSPSPQTGKPAMRTPLRELILQPGAVTNSGKMPPACSSLTPSLCKLGLQEGSNNSSPMDFVNTKRTDFPSEHFSHSSKWLEACQHESDEQPLDPIPQISSTPKMSEEAVDPLDNYMVKTIVLLPSPLGQQQDMTFEAHLDTIAETNSISLNEPFRTDDLVREEVAPCMGDRFSEVAAVSEKPVFQESPSHLLEESPPNPCSEQLHCSKESLRDSRTEAVPEDLVPSESNAFLPSSVLWLSPSTALAADFPANHVDPEEEIVEHGAMEEREMRFPTHPKEFESEDQALVSNVEDILSTCLTPNLVEMESQAAPGPAVEDVGRILGSDTESWMSPLAWLEKGVDTSVMLENLRQSLCLPSVLRDAAVGTTPFSTCSVGTWLTPSAPQEKSTNTSQTGLVGTKDSTSETEQLLCGWPPDLTALSRHDLEDNLLSSLVILEVLSRQLRDWKSQLAVPHPETQDSSTQTDTSHSGITNKLQHLKESHEMGQALQQARNVMQSWVLVSKELISLLHLSLLHLEEDKTTVSQESRRAETLVSCCFDLLKKLRAKLQSLKAEREEARHREEMALRGKDAAEIVLEAFCAHASQRISQLEQDLASMREFRGLLKDTQTQLVGLHAKQEELVQQTVSLTSTLQQDWRSMQLDYTTWTALLSRSRQLTEKLTVKSQQALQERDAAIEEKQEVSRVLEQVSAQLEECKGQTEQLELENSRLATDLRAQLQILANMDSQLKELQSQHAHCAQDLAVKDELLCQLTQSNEEQAAQWQKEEMALKHMQAELQQQQAVLAKEVRDLKETLEFADQENQVAHLELGQVECQLKTTLEVLRERSLQCENLKDTVENLTAKLASTIADNQEQDLEKTQQYSQKLGVLTEQLQSLTLFLQTKLKEKTEQETLLLSTACAPTQEHPLPNDSTFLGSILTAVADEEPESTPVPLLGSDKSAFTRVASMVSLQPAETPGMEESLAEMSIMTIELQSLCSLLQESKEEAIRTLQRKICELEARLQAQEEQHQEAQKAKEADIEKLNQALCLRYKNEKELQEVIQQQNEKILEQIDKSGELISLREEVTHLTRSLRRAETETKVLQEALAGQLDSNCQPMATSWIQEKVWLSQEVDKLRVMFLEMKNEKEKLMIKFQSHRNILEENLRRSDKELEKLDDIVQHIYKTLLSIPEVVRGCKELQGLLEFLS
>Gallus_gallus|XP_024997844.1
MARLSLRWRNPRTAEGPPRHSGTPPALCTSPHGSNKPKPDGNAVGVSCGAAHRRHRLRGVHGAEPPTQLRTPRLALRTTPAIPAGWAWPSRNHAHAARNHAHTRRSPAPIAGPIRAARGFQMGGGERRGGSAAMRGARVSAAQRRPLQELRLQQGAERTNITPLLRRLRLKDHDGGTPAPRARCPSGRVAPGLPRTAVPCAPCSADPEPLGPLKIPSGNATPDPISISEPTGHATPVTDAPEPPGDATSGPDTLVPPRDAPQEDSPPETPSGAPREPHGSAPVPIFPFSPSHLPPLPPSPDHPSSTPLEQRTPDPVGSTSIGPCALDTPGSPSPGPPGTSTPQDTPFRRWRVAPPDLSCSPVASQPLSENRDVGTPPHRSTLGMAGSPGTAPPEQCSPQVEAVGSEPVESAVAAAATPVPSSEPSLGAVSWIMPLVWLERTLPASSLLESLRHSLSVSWRDAGTNITPVPTAAVSTGVTPVPTIPVGSCVTPVPTVSTGTTVTPVPTIPVGSNVTPVPTMATGTSVTPVPTGSIATNVTPVPTGSIATNVTPVPTGSIGTSVTPVPTMSMGTSITPVPTMSTGTSVTPVLTLSMGTTMTPEERSAGTSMPAGAKDSAAETDSLLWHCPREQLRSLPRAELEGRLESTLIIIEALSLQLRDWQDCQRPLPAVGPAGQRDAHTQTDVTRPRGEEGIYHSLYVELQKKVQAVQRQRGAEQELAQQLARAAEAMDAWAGQRRALRDVADAALQGVQDEHAALEQERLQVRAMVSRCEAVLHGVPAKLQSCLQERDAAQQRADEALRAKQESDCFLEAFRSHAAAQIGARTQSLELQQELSALLAAAVQQQVSLAAEAQPFREFIDVTFASLQEERGALDGEREQVRALVSRCMTALRDVPSKLHSCLQERDAALQRVEEALQAKKEVSQQLEETLEALQDAVAQGEQLAVTNSRLSTDLSTVMKQLASLQQEQDALQQDYEEQKEKMSWLTKERDALQRERRELQEAVECREFLDQENRMSRRQLMEVEAKLQSTLAELQERSLQHEELLEAHQSLQEERAALHKELESTKAELQDLQLKRDRVSWCSAGIAESKARLQELADCLRAALPHQDDDDEVPSRSKTWTPGWRTPRGPWTPRSSAWTPVCRTPARHTPHHARASFVGSVLKAVSGRALCPSADGDEGTEGESTSARDRAASTPKPPEPEDGLMEQAAELRAVVSDLSALSSRIQELEQSEFRALQAEISDLQLQLEEVTTESQERMDAQAATIAKLNKVLQGKLQNEKELQDVVKQQEAKMLQLIDKSGEVTRLKEEVTQLKRSLQRAETEAKVLWEEMRGQEAKGDAAHVQERVLLRQEVDKLRLLLLEKEDEKVVVSGNYLEQVRGLELRLSQAQKMLRSQEELQEKVKEVLLALPEVPPELRALLQHVGLKPNSEKAPAPL
>Pan_troglodites|H2QCI2
MWRVKKLSLSLSPSPQKGKPAMRTPLRELTLQPGALTNSGKRPPACSSLTPSLCKLGLQEGSNNSSPVDFVNNKRTDFSSEHFSHSSKRLETCQHESDEQPLDPIPQISSTPKTSEEAVDPLGNYMVKTIVLVPSPLGQQQDMTFEAHLDTMAETNSISLNEPLRTDDLVREEVAPCMGDRFSEVAAVSEKPIFQESPSRLLEESPPNPCSEQLHCSKESLSSRTEAVREDLVPSESNTFLPSSVLWLSPSTALAADFRVNHVDPEEEIVEHGAMEEREMRFPTHPKESETEDQALVSNVEDILSTCLTPNLVEMESQEAPGPAVEDVGRILGSDTESWMSPLAWLEKGVNTSVMLENLRQSLSLPSMLRDAAIGTTPFSTCSVGTWFTPSAPQEKSTNTSQTGLVGTKDSTSETEQLLCGRPPDLTALSRHDLEDNLLRSLVILEVLSRQLRDWKSQLAVPHPETQDSSTQTDTSHSGITNKLQHLKESHEMGQALQQARNVMQSWVLVSKELISLLHLSLLHLEEDKTTVSQESQRAETLVCCCFDLLKKLRAKLQSLKAEREEARHREEMALRGKDAAEIVLEAFCAHASQRISQLEQDLASMREFRGLLKDAQTQLVGLHAKQEELVQQTVSLTSTLQQDWRSMQLDYTTWTALLSRSRQLTEKLTVKSQQALQERDVAIEEKQEVSRVLEQVSAQLEECKGQTEQLELENSRLATDLRAQLQILANMDSQLKELQSQHTHCAQDLAMKDELLCQLTQSNEEQAAQWQKEEMALKHMQAELQQQQAVLAKEVRDLKETLEFADQENQVAHLELGQVECQLKTTLEVLRERSLQCEKLKDTVENLTAKLASTIADNQEQDLEKTRQYSQKLGVLTEQLQSLTLFLQTKLKEKTEQETLLLSTACPPTQEHPLPNDRTFLGSILTAVADEDPCLDHQRESTPVPLLGSDKSAFTRVASMVSLQPAETPGMEESLAEMSIMTTELQSLCSLLQESKEEAIRTLQRKICELQARLQAQEEQHQEVQKAKEADIERLNQALCLRYKNEKELQEVIQQQNEKILEQIDKSGELISLREEVTHLTRSLRRAETETKVLQEALAGQLDSNCQSMATNWIQEKVWLSQEVDKLRVMFLEMKNEKEKLMIKFQSHRNILEENLRRSDKELEKLDDIVQHIYKTLLSIPEVVRGCKELQGLLEFLS
>Homo_sapiens|HSAP009093
MWRVKKLSLSLSPSPQTGKPSMRTPLRELTLQPGALTNSGKRSPACSSLTPSLCKLGLQEGSNNSSPVDFVNNKRTDLSSEHFSHSSKWLETCQHESDEQPLDPIPQISSTPKTSEEAVDPLGNYMVKTIVLVPSPLGQQQDMIFEARLDTMAETNSISLNGPLRTDDLVREEVAPCMGDRFSEVAAVSEKPIFQESPSHLLEESPPNPCSEQLHCSKESLSSRTEAVREDLVPSESNAFLPSSVLWLSPSTALAADFRVNHVDPEEEIVEHGAMEEREMRFPTHPKESETEDQALVSSVEDILSTCLTPNLVEMESQEAPGPAVEDVGRILGSDTESWMSPLAWLEKGVNTSVMLENLRQSLSLPSMLRDAAIGTTPFSTCSVGTWFTPSAPQEKSTNTSQTGLVGTKHSTSETEQLLCGRPPDLTALSRHDLEDNLLSSLVILEVLSRQLRDWKSQLAVPHPETQDSSTQTDTSHSGITNKLQHLKESHEMGQALQQARNVMQSWVLISKELISLLHLSLLHLEEDKTTVSQESRRAETLVCCCFDLLKKLRAKLQSLKAEREEARHREEMALRGKDAAEIVLEAFCAHASQRISQLEQDLASMREFRGLLKDAQTQLVGLHAKQEELVQQTVSLTSTLQQDWRSMQLDYTTWTALLSRSRQLTEKLTVKSQQALQERDVAIEEKQEVSRVLEQVSAQLEECKGQTEQLELENSRLATDLRAQLQILANMDSQLKELQSQHTHCAQDLAMKDELLCQLTQSNEEQAAQWQKEEMALKHMQAELQQQQAVLAKEVRDLKETLEFADQENQVAHLELGQVECQLKTTLEVLRERSLQCENLKDTVENLTAKLASTIADNQEQDLEKTRQYSQKLGLLTEQLQSLTLFLQTKLKEKTEQETLLLSTACPPTQEHPLPNDRTFLGSILTAVADEEPESTPVPLLGSDKSAFTRVASMVSLQPAETPGMEESLAEMSIMTTELQSLCSLLQESKEEAIRTLQRKICELQARLQAQEEQHQEVQKAKEADIEKLNQALCLRYKNEKELQEVIQQQNEKILEQIDKSGELISLREEVTHLTRSLRRAETETKVLQEALAGQLDSNCQPMATNWIQEKVWLSQEVDKLRVMFLEMKNEKEKLMIKFQSHRNILEENLRRSDKELEKLDDIVQHIYKTLLSIPEVVRGCKELQGLLEFLS
>Mus_musculus|MMUS013790
MWRVKTLNLGLSPSPQKGKPAMSTPLRELKLQPEALADSGKGPSMISALTPYLCRLELKERCNNSSPVDFINTENNFLSEQFSHPSTHIEACQRESDPTPESNSLFHTLEEAIETVDDFVVDPRDDSIVESMVLLPFSLGQQQDLMLQAHLDTTAERTKSSLNESLGLEDLVGKEVAPCVEDSLTEIVAIRPEQPTFQDPPLGPSDTEDAPVDLVPSENVLNFSLARLSPSAVLAQDFSVDHVDPGEETVENRVLQEMETSFPTFPEEAELGDQAPAANAEAVSPLYLTSSLVEMGPREAPGPTVEDASRIPGLESETWMSPLAWLEKGVNTSVMLQNLRQSLSFSSVLQDAAVGNTPLATCSVGTSFTPPAPLEVGTKDSTSETERLLLGCRPPDLATLSRHDLEENLLNSLVLLEVLSHQLQAWKSQLTVPHREARDSSTQTDSSPCGVTKTPKHLQDSKEIRQALLQARNVMQSWGLVSGDLLSLLHLSLTHVQEGRVTVSQESQRSKTLVSSCSRVLKKLKAKLQSLKTECEEARHSKEMALKGKAAAEAVLEAFRAHASQRISQLEQGLTSMQEFRGLLQEAQTQLIGLHTEQKELAQQTVSLSSALQQDWTSVQLNYGIWAALLSWSRELTKKLTAKSRQALQERDAAIEEKKQVVKEVEQVSAHLEDCKGQIEQLKLENSRLTADLSAQLQILTSTESQLKEVRSQHSRCVQDLAVKDELLCQLTQSNKEQATQWQKEEMELKHIQAELLQQQAVLAKEVQDLRETVEFIDEESQVAHRELGQIESQLKVTLELLRERSLQCETLRDTVDSLRAELASTEAKHEKQALEKTHQHSQELRLLAEQLQSLTLFLQAKLKENKAESEIILPSTGSAPAQEHPLSNDSSISEQTPTAAVDEVPEPAPVPLLGSVKSAFTRVASMASFQPTETPDLEKSLAEMSTVLQELKSLCSLLQESKEEATGVLQREICELHSRLQAQEEEHQEALKAKEADMEKLNQALCLLRKNEKELLEVIQKQNEKILGQIDKSGQLINLREEVTQLTQSLRRAETETKVLQEALEGQLDPSCQLMATNWIQEKVFLSQEVSKLRVMFLEMKTEKEQLMDKYLSHRHILEENLRRSDTELKKLDDTIQHVYETLLSIPETMKSCKELQGLLEFLS
>Xenopus_tropicalis|XTRO013147
MASGVRGLATRTLAGGLVELSKFKKTMWPLKAQISDENRITTMQTAQRKSVGRTPLKDLTAQSFTLSEQNSLVKTRLNSNKSPSLTVNKQHFKENKSGNTGTSPVSIWVESETQVPLMDNTISEVCASKRLKPITLFETKFTTLNSDGLAPKMKSKDSSNIHECLQPSEPATSEKILCLSACGQEKFPLNCLDSDSSVPSNADPCMNVTASLPVETQINEQESRKDRDQKLEADTCPVTVPLSHKSVVVSQCSSQALGETRKSLELQLCANEALKESPFGISLTINEAFSHAASTFCIPEQNDVAVSHQEIIDPSLSNHFNESANGNNCPNKTEEVQLLLSLKEEERVPNASELESCKMLNGLANDTYLIDTSSAASPEHVDKHSFPALTTNLISTEYSEQDGLDCSQIISTLDNTQPEGYYNKADKTDINKPLKGDDSVLPVSHKTKESPAPYPTTYIPLQQLADSSSKIFLHSFIQEEVCNKTFDLDCITIKDKKVDLKCIEPNSIIHTRSCDETDDLLVECKLLPEQTGGTLKIKDIADRGTDYKTELESSIVLEEEMASKNYDGSLKNENVKVHPSIVVQSDTGQAAVPLVASAKAHESRSDSVANPRDSVVNNQLQARNFDIPTLYKSVLSKMSPKGESSKLEVGTCSTPTSTSNTSTWTTPIMLLNKSLNTSWDFEKGRSSPRDNASETDSLLWNFSRESFNKASREELMDRLESTLIVVEVLSRQLQGWQQNRIGSRPSEQRDSATQTCVTYTSTEEQYYHNLYVETMERLQNMQRCNDVEKKLQEILKGSVDVLISNKTQSMSLIEFAENMQDKTQEDKADISRKMCQARSLIADHMTLLNKMNKKMQANQHQMAEMRTSMEKAVGDKEAADQCLKDLETHSSTVIAQLQRDLESEQLLCDAVKKAYTQQLSFNEELVDFAKKAQSVCSEMEEDRVQLQVKCSQARELMSKHWVLFDMMKNKTDHAVHKFESMKSERDAAYLEKNEMCNQLEDVNSQKAQLETGIAHLSSELESLMEQICKLKSENDHLKLENSEQTEELCAKDSSMKLLEKELNETTIREQEIKEHNKKLSAETVPRLEQKLLEALQEKEVLQIKIQEFQKQHASQTASYKESIEFLEQENHVWFEQVAETESQLKNNLFALRERNLQCETQKDRISELQSELLKLKEEFQMTKEAANDTLLKMGKEISDSSTEAGKIRDNLLCVKEQIMDTLHAEVAGVSQMLETPARGLGSCPSTYMINSTLKSQTKQSKTAKNAESIWSETSAFTIVQPVASPTTDNKEETLPDVICELGEIVSNFAVSSSYVIGVKEQEIEDFKREISDLKDELQNMHFKNTIEKRDLMEEIGILKRKNRNLEDCVNSKQQCVQELEEIVNQQEQRLLQQVSKEKEREDMMQENATLKRSLQQCESELLVLKDELSKNPTEAARDWMQEKLLLHKDLRKLRLMLVETENSKSEILHRAMRHRNILEGNLARSELELKKLDDIIEKIRKTLLSIPEVVSNCEELKQMLEYLN
>Danio_rerio|DRER039903
MSSVNGLSNTKPDRVPLRDVQNELLNMQDTPTLMVKHASTHVKDSNMKHEVALGENPSSLTITTDVNNSGQTVDATDEHQDLILKSFACLEGEVVVEDEPVLSDISVLIGHLGLEDNVPLQRDPNETNIIEDTKDNETSEEHVDHPYSCRSRSTGYGASSILHQDVEVENVTFKSFMCFGGEVLVSDSSAISNESIIIKDLASGNNSQYKATPVSKVDTEVVSLNPQPLGHSYCNWKSHESFIEDGCNISTINDASQSTVEHNVGTQCEHPDLSEGCCGVSNEQEEITLKSLSCSGVEIEIADLSKVSEMSLLQDNLAEEQSLNCVNDVTENYGQSFASLTPGSKHIDHMYCHAKEMSQVLNVSSTENELFSKSQCLSERSGNTVDATSPFGHITEEKFVSVRCLEMKKSKTHEQSSQHLSASNCENKTESSDVSKLNNSDDKPKKPKDDESSVMTAKHLEELDPQFMTEIKEPVSHSEETLCPQVAVLENVDRETNIPKDKTLSLKDEEIHPEIEVMRLCDASSQAISDHQDLPSAIALTRSCTPKTPTLSRSVLHDPSAENPMSHLWPELPESPMPPPLLNSTSLVNAFSYTPVPSDPPKKKDVKPSADHQNELNAPPVFGNGPLQEQLRQMAELLIVASGKMVVPAPAPVNHHNVSVGTSPVSTRSVCVWSTPVQRMERSVNTSTTEICKQANVSDASTSTDSLLWNLSPGNLEHLSRTELEQRLTSTLIMVEVLTQQLTSSRAHNPSKDASPSDLREKLIQTDHTELRQNGTYRDLYGTALERIQCLEYDQEILHSLYNSIQAMRVGLNSFKSSTEDAILKMKQIGASVTADQETLSRQASQMKSLYGRYKGTLQRMEEKMKDMKQRMDAALEEKEAAFSVTQQLRDHHISQVAELEDTIGSHQELMSALKLAYPSLVVLSKSYTESFSAASVHSRRMQEDNKKLFKELRKAQELVQRINPVLRHLHQRTTTAMEQSKQHLEIRDRAVEERNMMENELEHMRSSLQDASQQISDLNMQQTIMTSEMLVLREQLNQAEDERFLLQRRSTELSATVTSTLASYAFLEQTLASETSKLQQSVCDAQQATERANCLEEALETSRKQLEEFEEALLQRDILIKELQTEAEIHRRQLGQMDQLQTELSSAKEMSEFLQAENELAREQMEESERLLRCHLQGLRERNLECEDLKLALEQLRLEKESRQEELDTTRDKARRMLLEQGEQMAQACNDVMLLNHRVCNLTNILKESLTSKESKSSENTLQTHRHPSSSFVDSIMVAIMKTQEPETETSQDSEEREEPQDCIGSETSAFTRILQTTQTEVKEVRRSHMLELLSDLGESISDLLLNLDQLRVQKDMEQQTLKQTICGLQEAMQEASQTHTLEVSQLRQTVDRLQAQVDKDALVLQQKAQDERNLRKLCSEMEENMEAAHKYKAENNELRREVADLRRLVQQTQVEVQALREELDQSGIQSAASAKTLDERIRLLREVEKLKANLMETEENRAKVLERAKRHQRVHAMNQSKMERELHLLDDMIETVRQTLSSIPDLVKSCPELQKLAEFLG
>Saccoglossus_kowalevskii|SKOW007792
MFPSTNKVPFLTTRTPKRCPFGFIDGNQIRSVERPTKQPTEVPKSQTPLPDTLSLVISTPKVELPKPIVSVCEESAVEAGALTDSQYLTNKCDWPDKMPSDVEISLYVKNIIENALKTLQDEQIGRLADVVLSSEKCDSATNKCSELTNGNHQVLQNTSYCTSSLRVTSEDSGACTTSVGPTSSLRVDKVTRKDCGTCTTPLAAPILCDAESNTQTQAEFYEASSSTMTTPTLRRDIDQGCSPIKPDMIDSASSPQAPPSSSISTMTTPKKHFNIETMDFAMYTSLGPTLVDASTDTSPVASREIETMVTPKSVVSVAASPIPIDKKDVCLGMTPMRGVDEETSITPACTPINSETMTTPLVVPPVFSMDDYTAGKSNKLLDNLESTTIRNELLRKENNELKKAKSSLSVDLTCIKVELSEQMDKIRKVKEETRNEMQKEIDTILAQNGDQMNEIGKLSSVITQKNEEIAALEEQQKTDKRLYQEEIHNFQIDLKTIYKQHKDEISALKLDNALLHHYKEACKKIDLLEEEVDKHVRHAQVLERKKALMTTKKSELATLTEHLKKQATIIEQNNVYLCEKDASLRMREENVSEREKKVFVAESETRELQKEALEAIKAKKSLQLQYEDLMLQLHESTAQIADIVSDVNNYKEEILTLTLELEKSHKENSELKEENQKVLLEGEVIEGALKLQEEEIIKQKKRAEDAENKMVVLNGEIEKECRQAFDDLNSMMDRINVLKKENEQKDAVIRKQADEIQQNSHFKVLCSTLEEQLQNIQSQFAENKDFMEQEHRTIAESLQETEDNLKVEHLELSQKNVLLEEKLEECRQLKDTVEKIGSELDECQTELDNTKAQAQWMIYKRSYEISAASQVVVALREDIYSMLEFLRGKLGTSQDEVSKNSKHQDQPQGSVSSLVSSVLNAVRSNNDISTGDPDKRPTLSGSDSSAFHTIQSTPDQPADCSTDPENTAESAKKQDATLGDQLVGIRDMLTDVCRLVQVLESAGCNTIKELKETTALLTSNMERLKERYNFDIELVKDQLRESESREKKMQHDLKNKRSELFEKEQALDYANKKIAELAANLSRFPDQQSHIQKLSKQVEKLTSECQTLGRDKAVVHEELEMALKRIEELAASTGMESKEAFYMREKIALKQEVQRLKLSILEKDEYYQAQSTTATRHATTLRENWKRAEAEIFKLDEMIEVVRKTLEQESDVVQRFPKLIELAQYVEGKDS
>Lineus_viridis
MSSVGSPLRDQENVHIHVQQTPKQWRRSAPVTPLCSLDVNKLGRTQRLHKSEGDSLLKLGPCESLPSTAVPDEGDCGHDEAAIKEHPEEKGEMKTFGHYTPLDEMQTFVQASPAEVTSPPQSFKVDIDERPKTLQWLTQKNERCVTPEFAPFTGTTPLKTPVKISELFSPIKSPDTRLFVKNPTKVTFRLSQAFDIQTENGKAALPIIPIKPVAFVPDSSRYLSDDHDSVDGDAGVDFGQCTSPIRQQDQASGNVHLVFMDTESQTNTSAVHMVDVDSQTGTSYAYLIDASMLTSPAMTADVSSLTTPIRLSDQSKQTCTTPLVMVDTGVLMTQTRPISPVHNHQDRDMSDQGTAMTPRFDSGSLDEQEPITHDAMETPVKTAERNTFMTPVAMKDASVLTSPIGNMALRLSDPVLSSLTPLEMRKQLEMALISNELFRTELTGLQREKSTQSKQMSQQQADIRNKDLEIGQLLEAVEQAKVDTKRSMEVELTSLEGQVKQMQGHVSSAEAKVKAKEDEMMVLKCENNNLQDDLARIYKQHKQEINDLHAEYARKDYKPHFEKAQQVIRKLESEVETYFELMGSMQGADKAQDKLSTAMDDKYHKLKGMEERMLIERKQLNQEEKEFMEGVATNEMALRTATNTCHRMKLEVDQMKARLEVADRTINDSQLYQDEIMMELKMATEKLAKISQEFSENKKNLTAANQNIAQLESVLGEKDEDIVQLEKEKQLLSRECRSQSELIKKNIPIFPSPETPRNKPRETMDFLEEENHLLADSLKEVEQSVTAAQLELSRSQNQLREKTVLCHKLELTVKQLNEQLSSLQAELDNTKTNAHFMLLSQGAELADVSVNVSMLKDKMTEFQEKLRITATRVLKGVETIPVTQAPAGAVQGQGLSFVSKLLEAVDNKEKEGNQLKHSDGASGSDAAVHQTDIDDSSVSTRSEPNNNLRIGSGNSAFAKVTPGGGLSKRGVGVGSENNGSAFIPVTGKRSPYDDGLMNGTQYEAKDMSLSTSCAENQEPTIKEELDHVIKIMDAIVELVSGCDQARDRMFHAVKQENQQLLNELELRQSGRTDLQRLKKSAEESERDQIQANVKLLEKAEELEECQAMLEDMRAKCNELSHQIMGHTEQEKLLNKLNEELSVALAEIKHLKSEKAMMEEQLENAMKTMDKDGSGEISRGQYFRDITALRKELHQVKEKFVEKEESYKELKEKASRRMNVLEQNWKLAEDEVFRMDGVIEQIRTTLHTNAAAVKSCSPVFGLIKMLDGDDAERSMENS*
>Owenia_fusiformis
MLPVPRYIDNPTIVRNKENPKQAQPSMASCQTPVRTPLKDVNNTAVVAMVKKGVQVGTPNNKTPRRKSDKMKGALKKPPVAIYEDITPVKDKPSNEGAALMTSKPCEESVALNTLVYNRVVDIVSKTQQAYEAELAARDNKIGELTEQLEQRSPVATKPQADSVNESHFLDLFVDILVSSTIDNALQSLSHPHGNNTSCHSNTTCCHANNTTNTDNQLNPDIQTPIIVPCKKGILLNNQQNNDNSNNQTTNPKSNNSKTVNFNDDIVIIPASDDIIDEESGDSNEHKCENDTKTEIIDETKTTENDTKTETKDLPDDTKSANKRMSETRTINIDSETCYKSLDSRFDKIMSTLSESVSTTLTEAQSKQQEGSTTCMSQSHQETMTDIVQVMVVATNTSPMLRAQRVFCDSETSTVTPIKCINVETCTSPTQSSSIETCMTPKKTLDFEQNTSIAMATQSICTSPIKTSTTETMVTPIKCQESSQMTSPVGMATIETMVTPTKHTDSAQGMSPLPSKVDSSQGMSPLPSRINTSQGMSPLPERVDRSSITSPVGNSVLRYSKDDLSDLNTHDLAHQLETATISNALLRHELSELKQTQEHVTKQLDEARQNDFDNKMEIEKIKEEQHLQLEDIEASKDSELKELKGLVCDQQRTIEDLKTSLSSEAENHQKQLESIKEENHNLQEDLCRTFKQHKQEMHNLEKRHQENDYKPHFERSQIIIEELRAELDVYVDMMSSLDTANTVQEELMSVLSQGHSEVTQLAESTLKQKADLEEQHKVMVEKMGQNDNAMSEMTDENNAMREKYEAMKNEWELMKAEKIQMEILYEGTHADLGSSMTRISELTDSLSLCQERLQEKTDLLKVLHDDMTILQDQDCDNFMHIQTLHAALGVQDMELDAQCEKTAEAEKQVKVLQEHLNAECERFDIDTQNLQRTLDSREEDINTLQAESDKQRATIAEMTTYIRQLELQVEESKYTYRELCMTKDLLQSTQSSSKETQEFLEEERNMLSESLAEKEESLKQATMMLAAKQREFQQKSQLCADLTEQVQTQSDTIHQLKDELDSTKAHAHYMLLNQGSEIRDVAFETDRVTQRMEQVIEALSEKTSQFQSDKAEEDEPEEPIPEPPLMTSTFKSQSLISSILSAIQTSPESPDSSQEPIKISNVSKMADTSKMADSSNTSNLTTTNSIYVTPDQSPDVEITDNTIQQPVQIGCGNSAFTKVTKLSNKDSIEERQPHTTKDSASVEGDMTSFDEVDAMPVDVCEASQYAEESPSKSPGEVENGVVDRVASLGDMLSRIISLMTKIEKVTNANKESLTQDIESLKCKLEASKTFYKEETTNLHQQIHSLQEREVKFRQELVERKNEIANKSKDLEYTKSKLESMADNVGHLVDQQSTIEKLSKELKSLQVLNSSLVAEKTQSVEHLEEALKRLDDVSKGSMCYVSEGQYLREKHNLKKEINILRGKLSEKGEYCDELSAKANKRMQLLDENWKKAEAEVYRLDELVEHIRQVLHAERNNLEGLKALEKLQRDLDGIEAAQTPLRSINSKNYPKLDLETVKTGNLFL*
>Novocrania_anomala
PVGKSSTSTMVTPVKLCDVGQTTTTIARVDTGSGATPVKTVAMGQQMTPVGKSSTSTMVTPVKLCDVGQTTTTIARVDTGSGATPVKTVAMGQQMTPVGKSNISTMVTPVKLCNIGQVTSPSIGTDVGTMVSPVQLTDQCQGTSPQLRIDLGTAMTPVTATDKSQGTSPALKASVETMVTPIRLVDSGQMTSPVQAATPVVDRGQTMTPVCKVFPVRPVSVIQTASPLPMADLSQTASPEGCSRDVMTRCSEHVPGQQQEYQRHLEEAQAVIAELQLELDAYQECMESLEKAEKKEDQVKSAIDEAYFKVKARADSVNYQQTLWEQEHTEWQHRMADNERETKRAISEYDRLKEENIKVLQDMEKTNEASRKVEEINRFTNEELMEATSQVSELTGNLNQVTLSLENYQKHNEDLTSQLEDSSYKEHVAFVENQALNASMLVQERELNKQMDINEKNKKQLREVNHLLEEECKSLEVDITNLQRTLDFREQDIDSLESKVREYETSIEELQRDNLSQEQTINSLSQDVEDYNYVRAELIKCKEQLEITQTQAKETQEFLEVERTTLADALRESEENSAIVGLEMSRCKAALNKKSQQCQHLEWTVAKLRETNQSLEEELDGTKANAHFLLISQGAELRDSDIGITALGLKMTALIEALEHQSELYNREDQEATTILLPDNNYNNDERYVNTNPESPVTPLTPPLMSSTANSQSFISSVLTAVRTAQNNQKLGESEVSVDLESPQLSELGSTNSAFSRLTDPKKLDGQAGAFVPVKCVETNHMNETENHQDKYNRGQSNTAGQQEEKSRETNDTTEETSLQSRIAVLVKQFGRLVHLINILEKATFQSMEELREDNETLQSELDNTRHSSDEKIQITQQQLKSAQDRITGLHTELEEKTEELVACNKTVKYSRAKINELVENLTRFSDQQSQIDKMSHEIAKLNSLLRGTENEKKLVQKELDSALVRLDDLNTGRGVDLPEGVYIRENLALKREVLKVKEKLMERNEKIDSVTSKAQRKIRVYEENWKKADSEVYRLDDLLEQVRKVLLKNKDIVAECEDLNALLQSLDGGDPLLTPAAEQLTGGQVAAL*
>Priapulus_caudatus|XP_014676021.1
MTTEEDSVEHLETQVENLARTLDCRDREIDSLQATVDELRRERAAQTAAAMRQSAEAEECQQQLRETRRRLKVSVQGGAIDDGGGATGRRTLLQDQHDDHQQLLTATQQLREQQEELQVELDATRCRARVMLLQQAGELCEAQTAVLKLRSRMRELIRRLEGQLPPEDEEQEYTALTPRCHGDESDSVLAEPLEYTYAETPARPPGGVIFPSFVSSVLVAADDAAGQVTENRPIAEPRSDNAAGQVTEDRPIAEPRSDDVAVNGKVAIPSVAEETKGALASVERLEEVLRKLEAARKAALTTARNEKAVLLSKQRVYEQRVRYVNEDVRALERRADRLHAELLSRMDELRAKNDALAYANARIRDMSDAFPPLTTLQHENEAMCSQVALLSSEKQSLQKSMEWLLSGWETSAGDDGGSGMPVKEVVFLKTQLLELQSKLEGKEGLLQELKSKAQKKMKTLEENWKKAENEVYRLDELVEQILQVMLSLPTIVESSPELTELLAMLQRTECSMQSDM
>Branchiostoma_belcheri|XP_019622334.1
MPVEEKLRVELNLKREELTAVQQALEYSKAKLTQLSDNMGCLSDAQQTCKKQTAELEKLGAALRSREEENRLLREELGSALGQRSCPDGQRSEATLVKERISLKAEVSDLRLKLMDKEEEMTQVLATANRRMKAHEDNQQKAETEVCRLDNIIEVIRKTLHKHKDIVGTCDELTELLRDLDGDENSEETILYV
>Acanthaster_planci|XP_022109686.1
MFATPRKQQTTCIDKENVNSEAKTPGKSLNLLATPNRKPLSSLNQDVTSQSCKSSHSGKILPKIWTPLKDCTPKRSNPASKTHGTQSKSLRKSKGQSVSFPSKSSLTVTEAAKSLLHNETESESKELVPTASDGDHLLNQTVKRLVYSTLDATMQELSSEQMHQATLSCPTCVTTIKTEPLALISRSPTTDRLWNIALGLDDSSNNSALLMPQGVTSFFLENTPSPCGIACTSEVSSVREVKRDSTSRMDSSPSMVVGKSSFIPIYLANQETRLGINIQQDKATLHVHTVKEDGDSRMSPARLVHSLPGPTSIICNKTSLKNDSTMAEVHKLETVTKSLVELEPLMQVMPAQKASNNSCMVPIELPGTSSDIVTLEYADSGTAVDSHSETSASLSTIVMDSHVMTTPITATNSTSMATPIQFSDAGCRNTPIKVAGCTTVTMPTHPIDAGNETTLIEVTDYMTMTPPACSVDTGNGITPTEPVEVLNRVNKSVNMTPVQLRDSAVGTSPVKYADANFGTTPVKVSESLTATTPANLIDASVGHSPIKPVEMLNKLVMVTPIKILNASIETISVESCEAKIGTTPVKSADVGLCTDPAQICDSSTATSPVRVIDVGVGTDPHQTADIKCGPTPVRLVDMNCGTTPHTSLEASTSTTPVSVNAAETLTSPIVVPAFKLEADSPSLLDTTCLMSHMESASISNELLRREIQTFKSTQAELQRQLDGARDQLKVVERVEQLDQRVELRQTAKETLQNEVDKLLLQVGELMNQLAILQAALDQKSCELANTQQEKMHLRDQYQKELHNMQQDLCTAYKQHQQEVSEIHAFYKKNNYESHYKRAIVTIAELQTEIQAYTDLKDTLQRAAEIQEQFGCIEEAYSLVNALFNRTMDKKDELEQERMEIVDHVNQIKTENEQLRQQLQIAEEEQQCLQTQLDDTICAEKEALKCQDQLLQELNETSQTLDEIKLELRSTRLELLDYKDNYETSKTKNEELRQESINYFLKESTMEAALALQGKQWQDCVAEVEVFKSQTEVNIQNLMLENTRLLDVISSMKQQLSASQDLIALLQSELERNNEILNQQVKELDNLKAELEMNREARVDAQRMANQMQTLRKQFKESIEFLEEERVALVESAREVEDQLQVTNLELSRLKMALSNAEEVGSQWKGATENLSEKLQSCQSELDNTKAHAHWMLLNQATEMRDASDGLAALLQKMQGIHSCLNTSKEREQLSNEASLPQAASELGIKTKSVSQTEALFPSSSLVASILSAVHSKEKDINDEDTATEQNPCNSGKQLPRSPSPETKLTIGASGSSAFISVQKSTNKSACTTEEVLKERTDNSVALIEQVEQVKTIFGQMMKVLLARNETLESVVKDLNQKRTQLKDKLQKSQGQYDRELCIIHEQLHQSEMQERRLRQEVANSNASLTEQQQALHYAQQRLQAMAENLGRFSDQKSTIEKLQRETAKLTSTLRIAQREKSLLQEQLDTILLGCSQSSNEDAVDEGMTSQPLAVNSDLVRENLSLKKELEKLRAHLVDRQEHYERLNTRATKHMRVLEDNWHKADAEVYRLDELFDHCKQLMEKIPASSDFDPNMSALRELLI
>Strongylocentrotus purpuratus|XP_011669231.1
MKTLEEGKASLEEEKESWRQQMEDGERRMRENDEKMEEMTKMKEEEEERRCAMENDLAEATAGMRDLQGRLESKEADITKKEKELQELSSKCTQLDEREVAHFLEQQSQEAAILVQVEQQKTIQTELDQTKTNLQETIDQLHKQCQSISTEKLILGIDLNSAKAKLYSVEAELQDTKRTSEEHRTRISEMGLELETCRNAGAELILVKSKLKTLVKQFQENKQFLEEERTALEESAAEVENELSITSMELSRSKASLSQADLCRIKLQESMSSLSEQVESLQSELDHTKAQAHWMLFNQGSEINDASAALAELCQGISSAVAKMSDQAVLKFEEASKGGFVTEQRGRGSNHRSKHTSVASAKPGSLVVSVLRAVDHIETPGKAPSVGDPRLTTIGQSSSSAFQAVRPSTQDDHREGETLVKDDAGEKKSVEPLPDQILKLKTSFAKMFTVFIENEEKLREEVSRLQQQIQEKDQSSKKIIQRSENQVRLLRDQLEESLTHRHQLQQSLADAQNQSCEQLQAIDYAQQRIESMATNLARFSDQKSKIEALEEEVARLTSSLQLVTREKEMVMSQFEALASQPRQAAASATGDGESMGKLLKENLHLKKELDKGRMKFFKRQEDYELFQSKAGKQMKVLEGNWKKAEAEIHRLDQLFDHCRKIMDKVPSQMCRQDPNLNLLHEMFGSQ
