# Supplementary figures and images for: Kinetochores attached to microtubule-ends are stabilised by Astrin bound PP1 to ensure proper chromosome segregation
Source: eLife journal article supplement (doi:10.7554/elife.49325), 2019-12-06

A

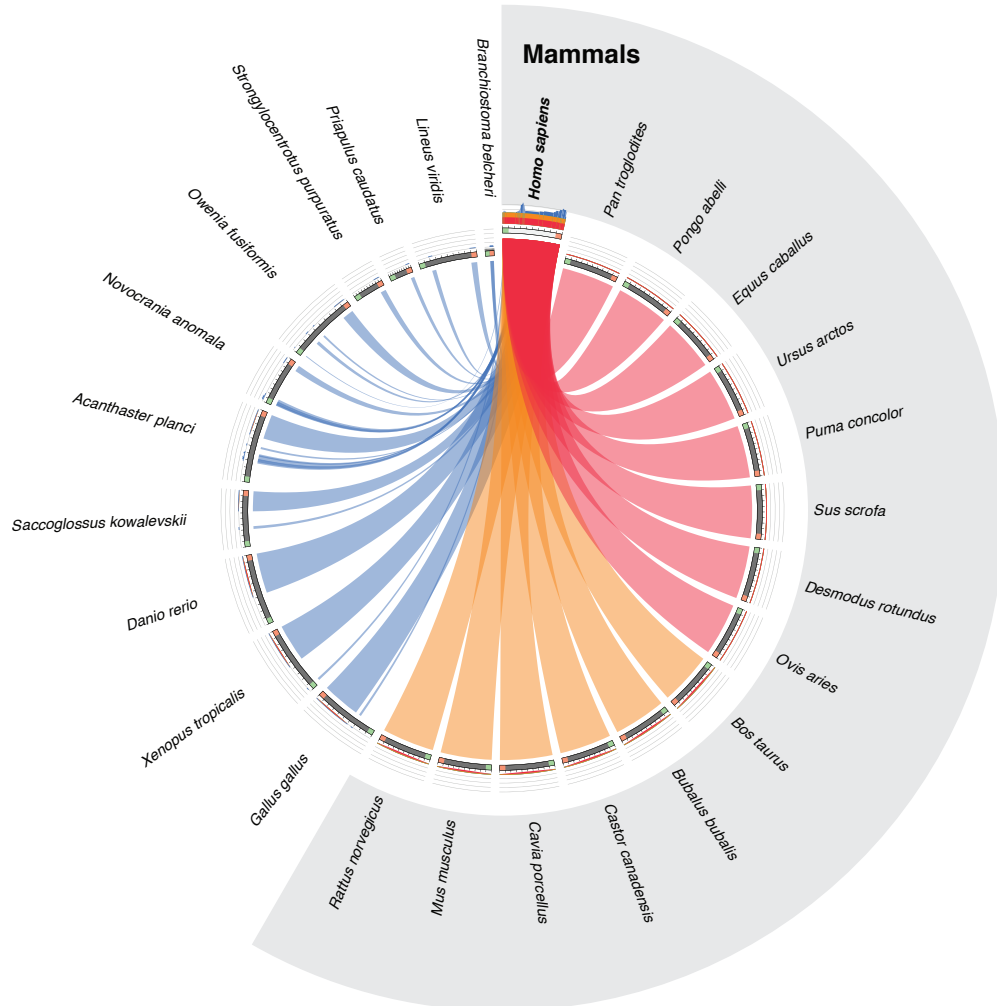

B

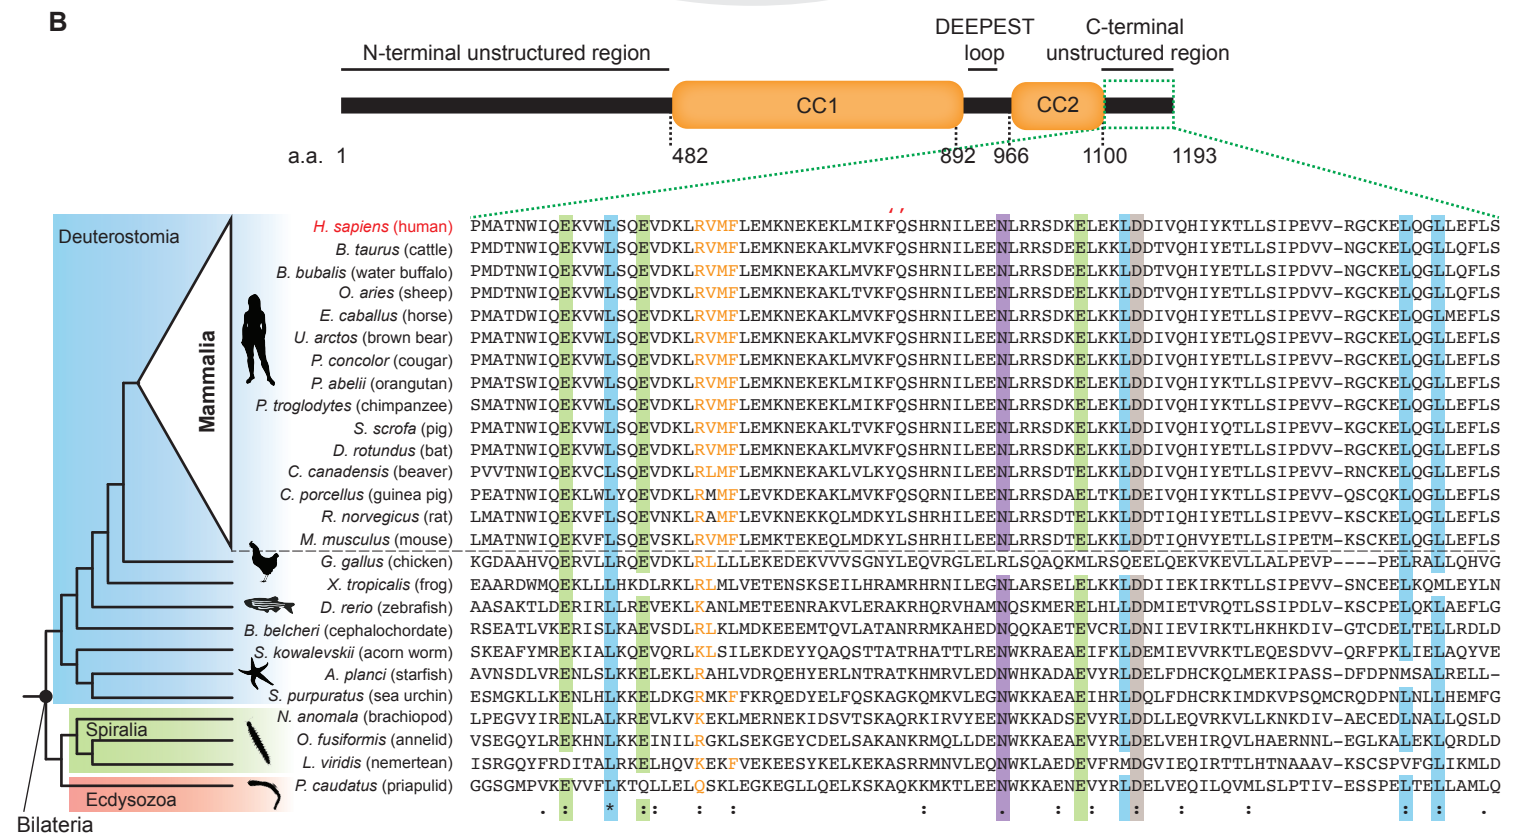

Supplement: supp [file elife-49325-supp-v1.zip › elife_poa_e49325_Figure_3_figure_supplement_1.pdf]
